# Supplementary material for: Analysis of the Phospholipid Profile of the Collection Strain PAO1 and Clinical Isolates of Pseudomonas aeruginosa in Relation to Their Attachment Capacity
Source: MDPI journal article supplement (doi:10.3390/ijms22084003), 2021-04-13

**Figures S1: Distributions of phospholipid quantitation data from 8 biological replicates per strain.** “LAC” stands for “Low Attachment Capacity” strain whereas “HAC” means “High Attachment Capacity”. Numbers after these acronyms represent the clinical strain number. Quantitation data corresponded to the relative amount of a phospholipid among all the quantified phospholipids of the same class. The distributions are presented in box-and-whisker plots obtained via Statgraphic Plus 5.1 software. One plot was performed for each phospholipid quantified in our study. The crosses (+) indicate the means of the distributions.

**PC 32:0**

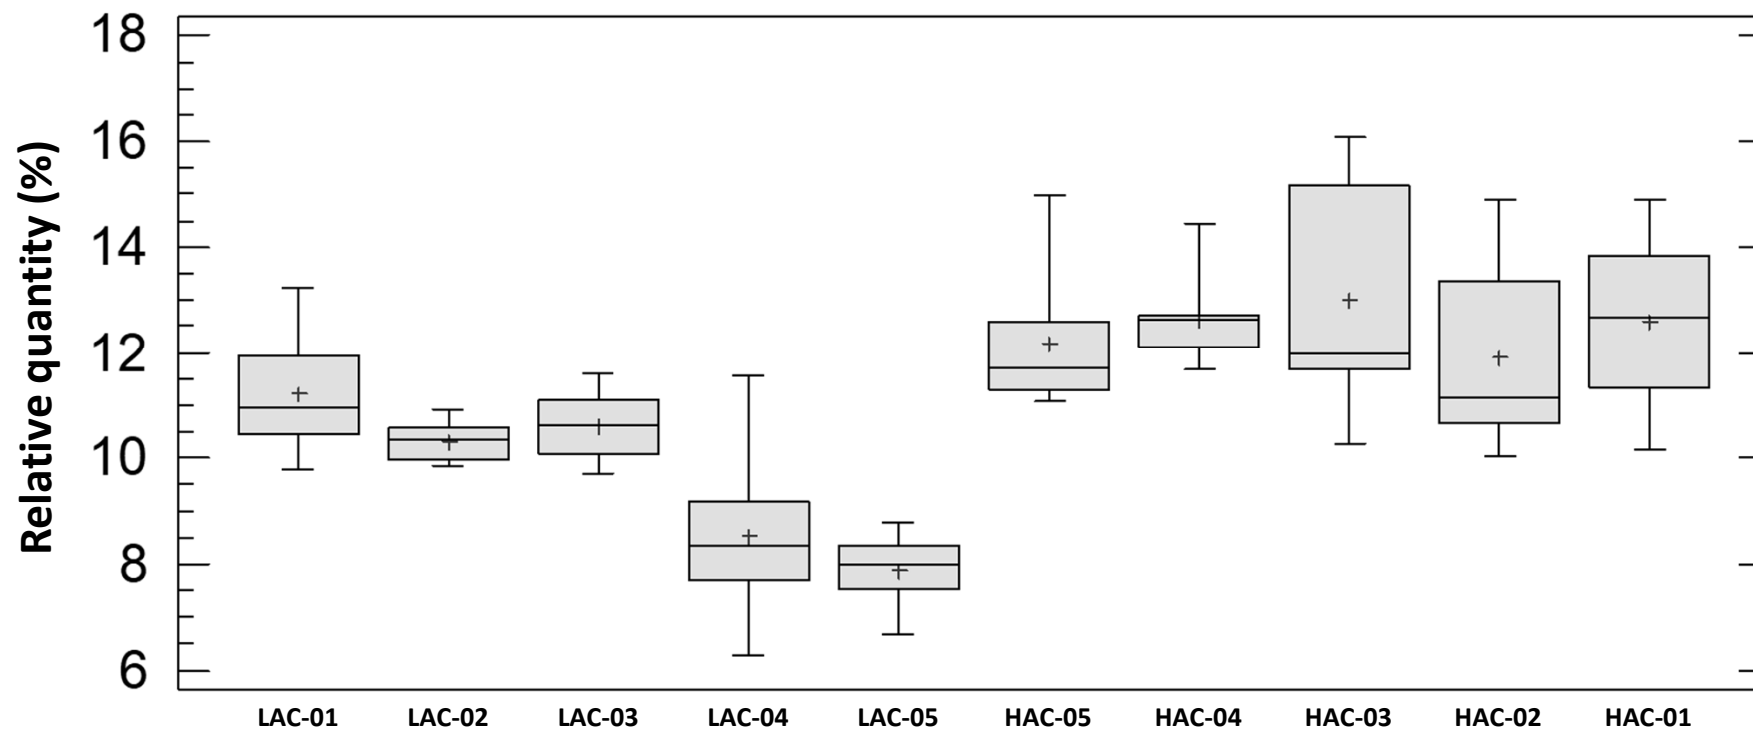

**PC 32:1**

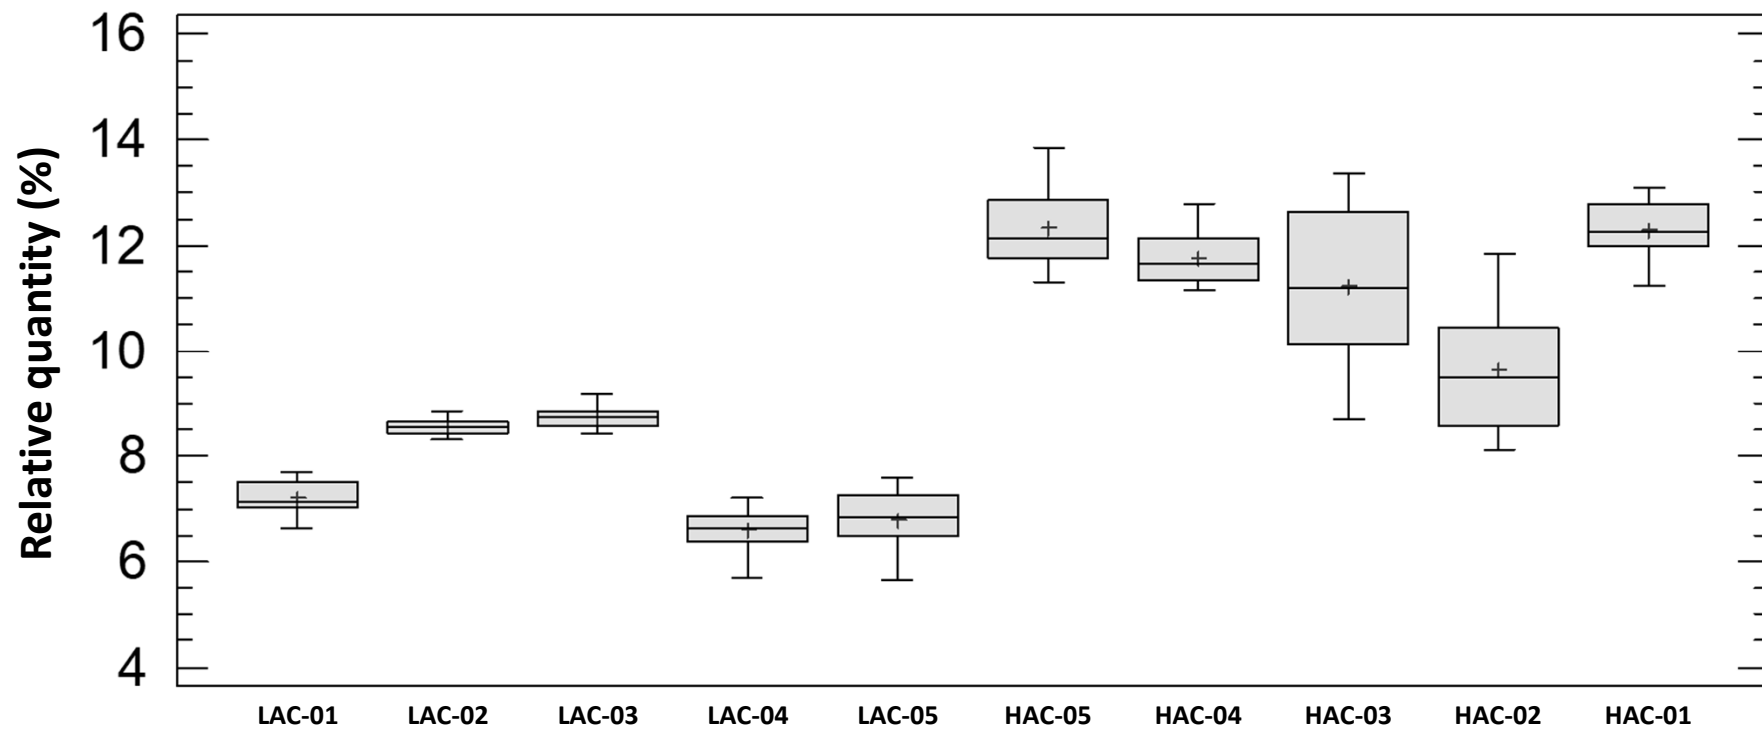

**PC 34:0**

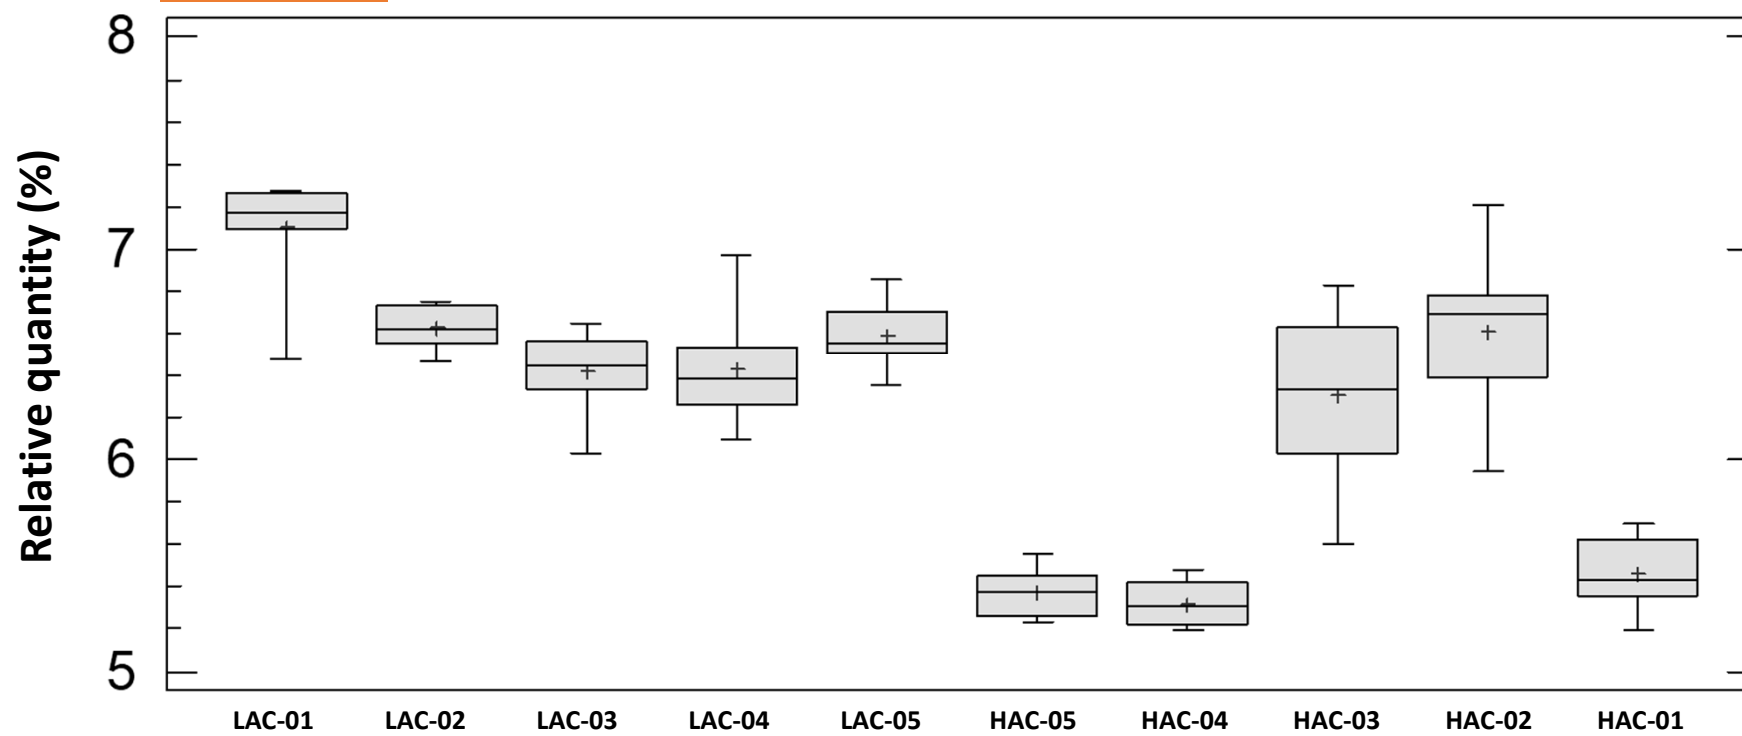

**PC 34:1**

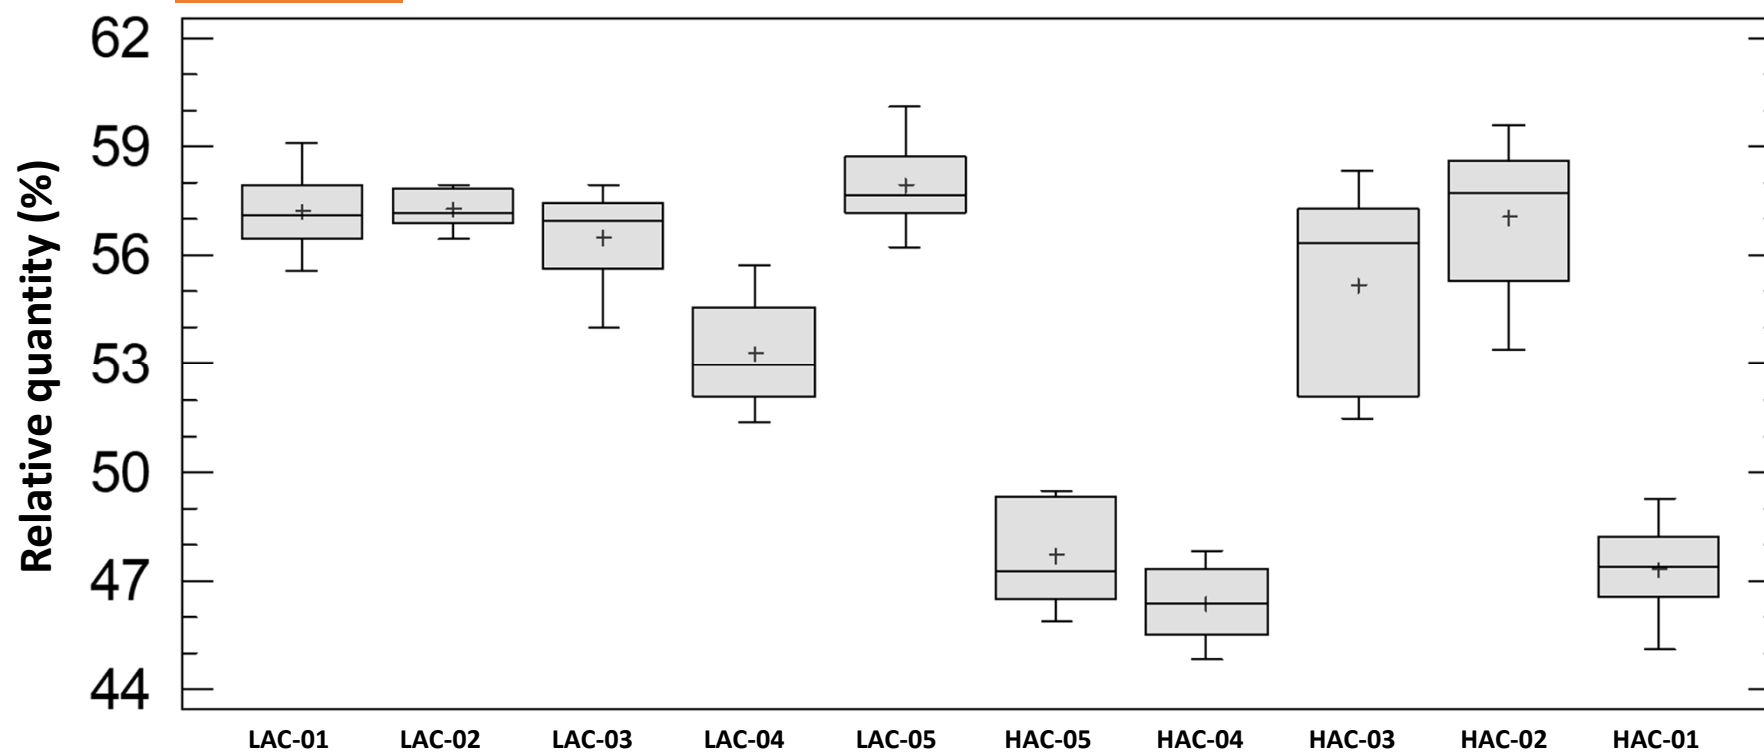

**PC 34:2**

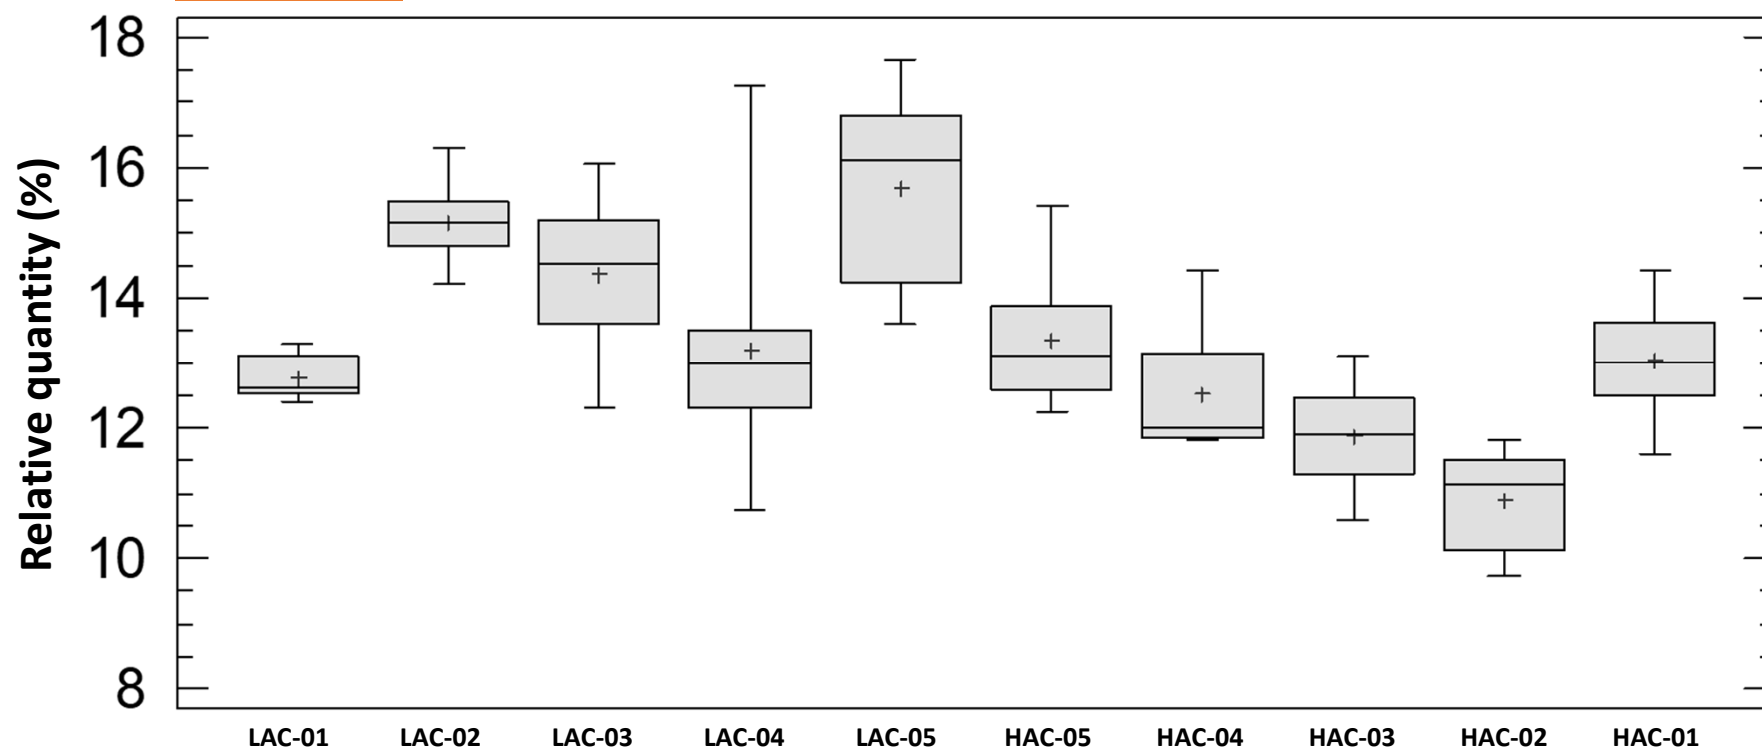

**PC 35:1**

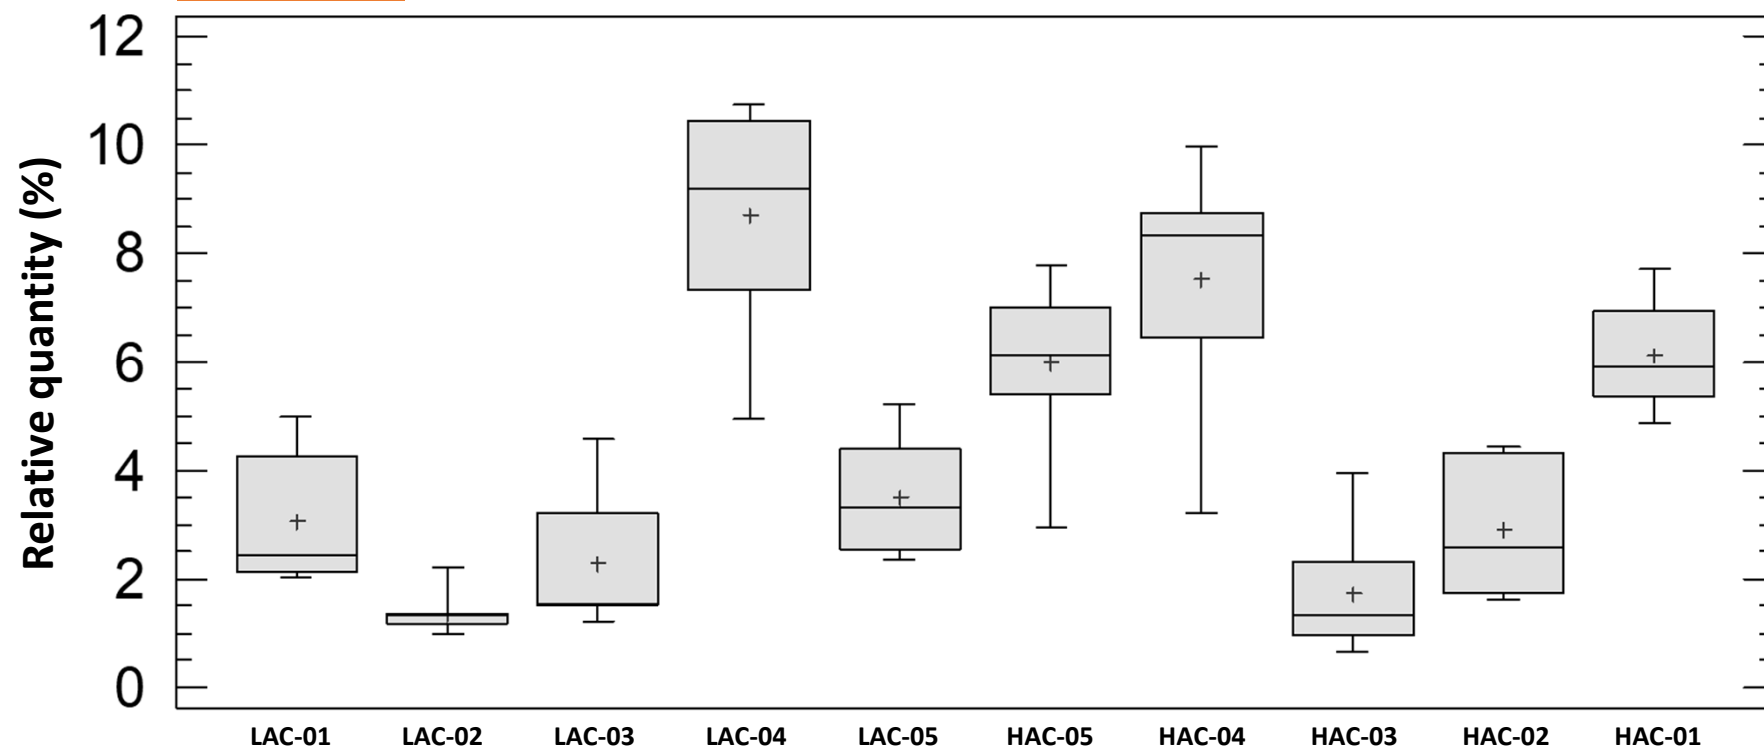

**PC 35:2**

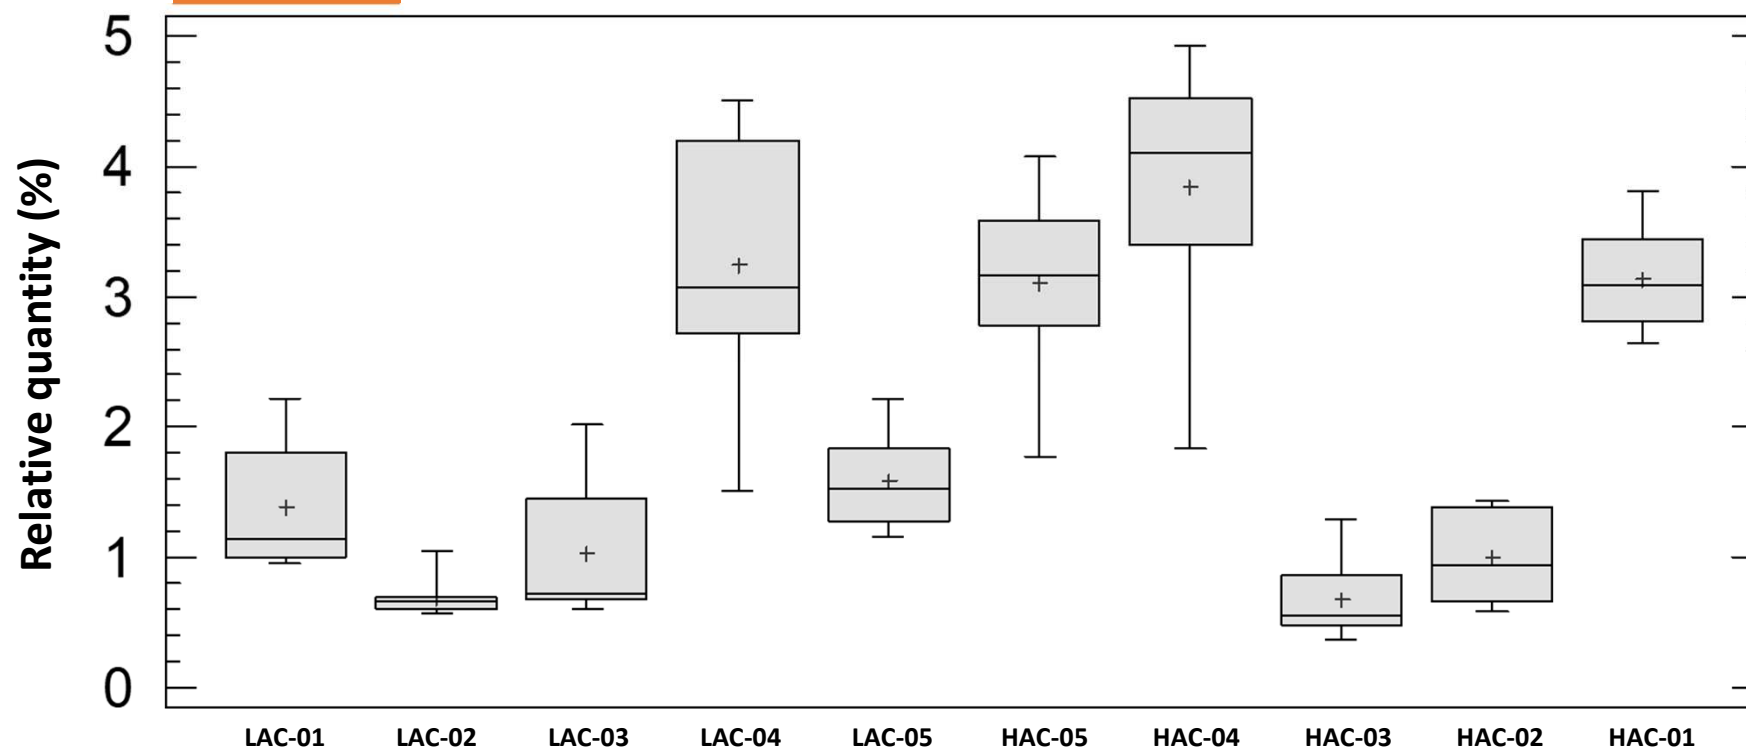



**PE 14:0-18:1**

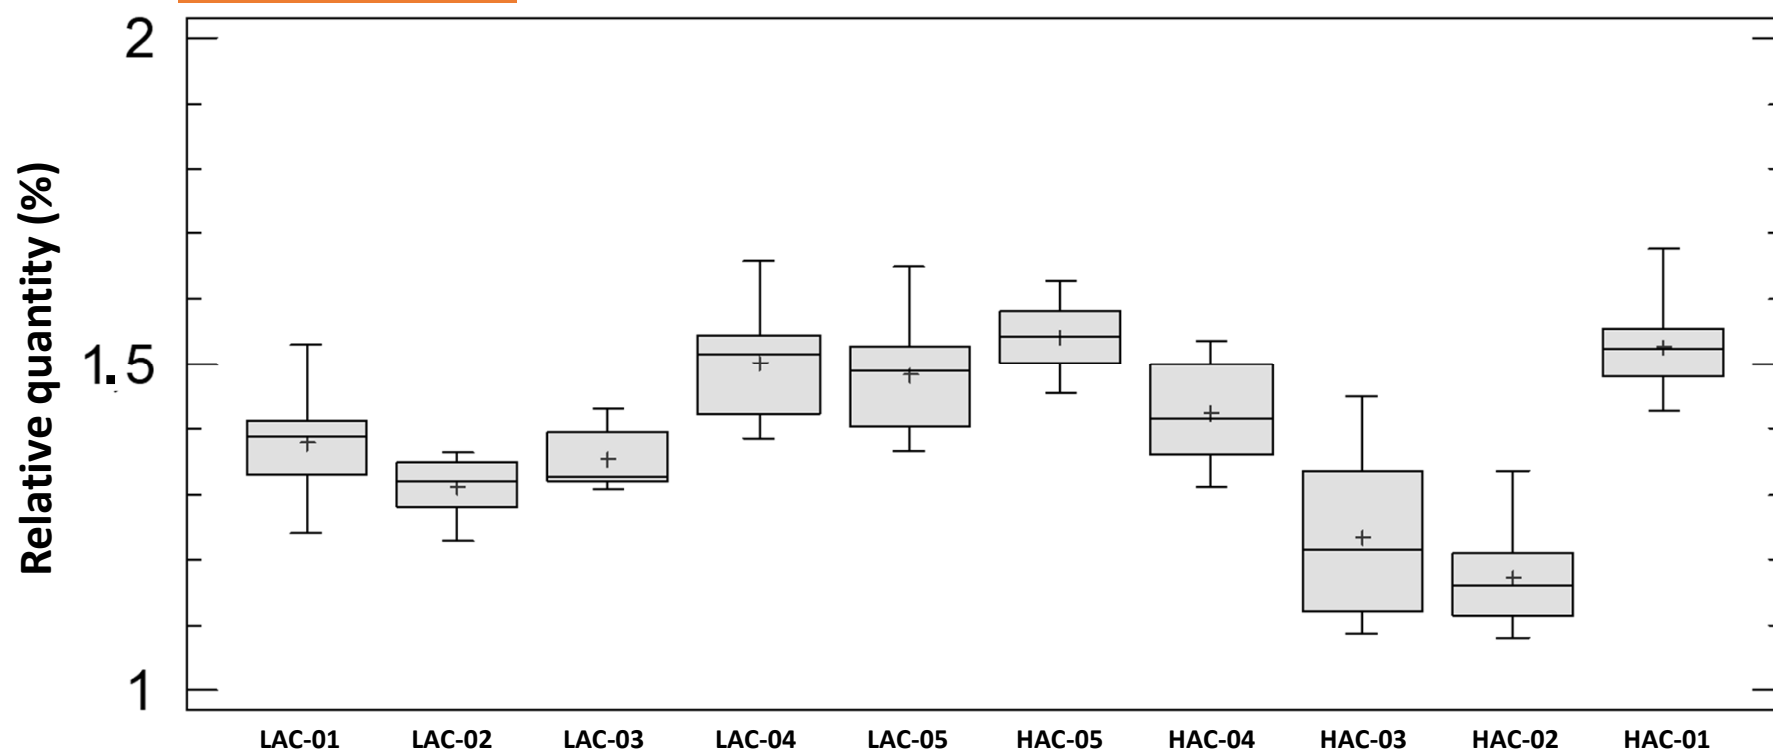

**PE 15:0-18:1**

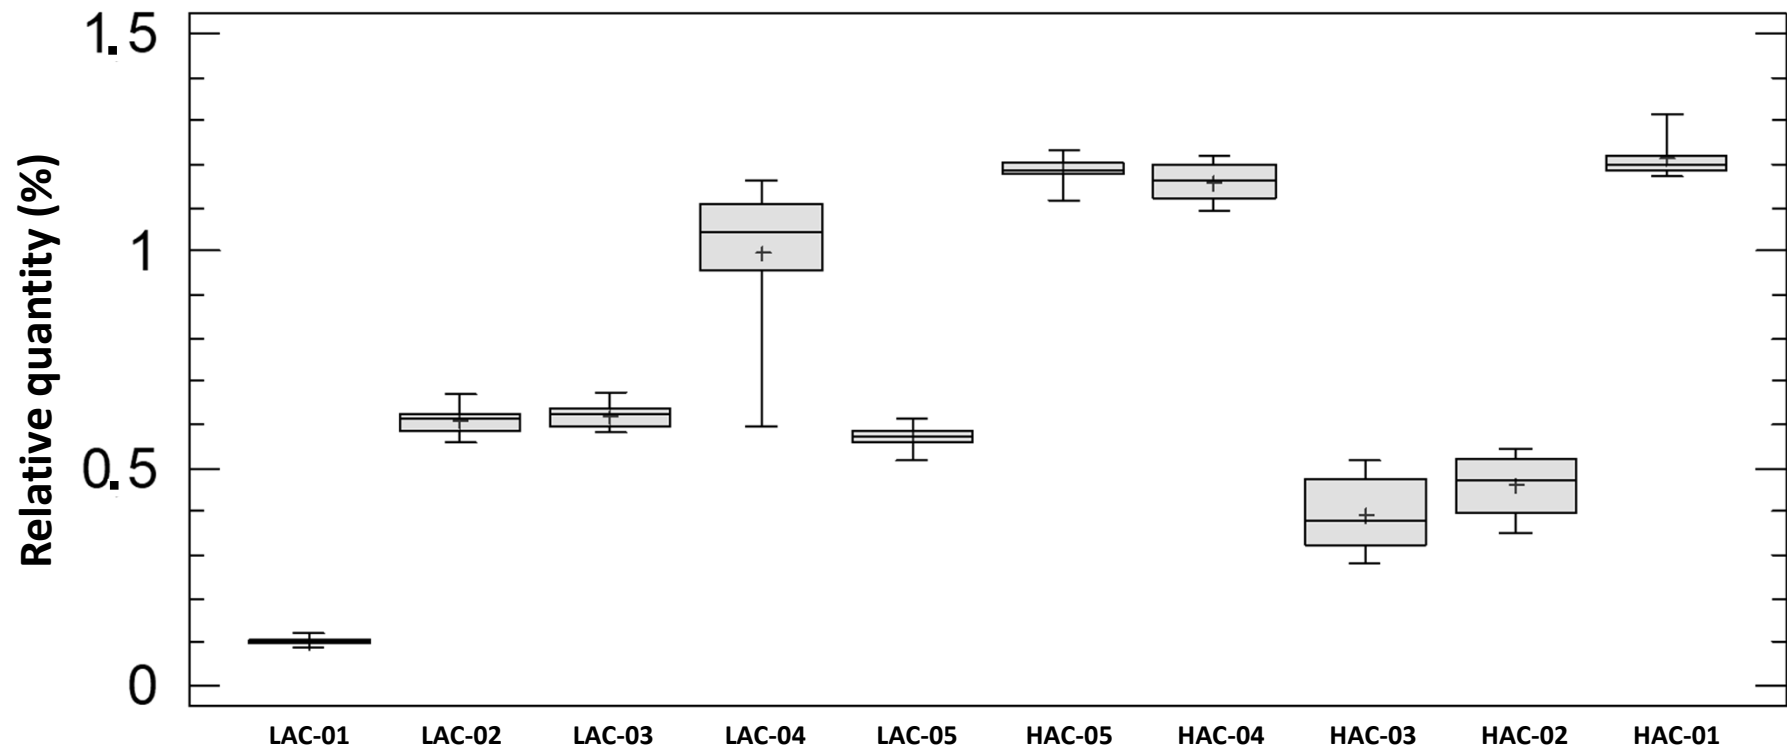

**PE 16:0-16:0**

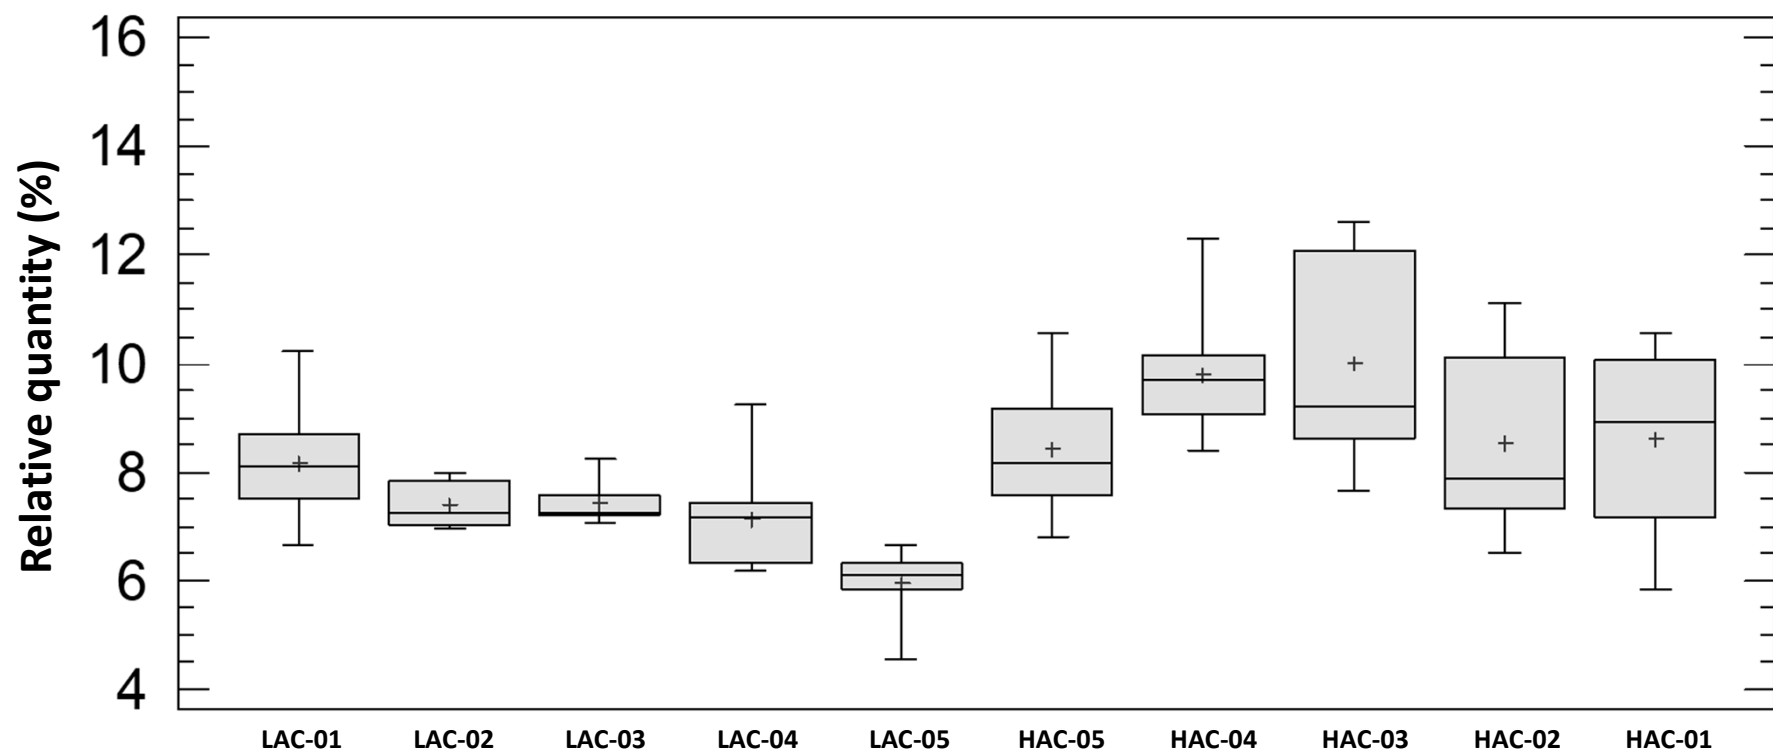

**PE 16:0-16:1**

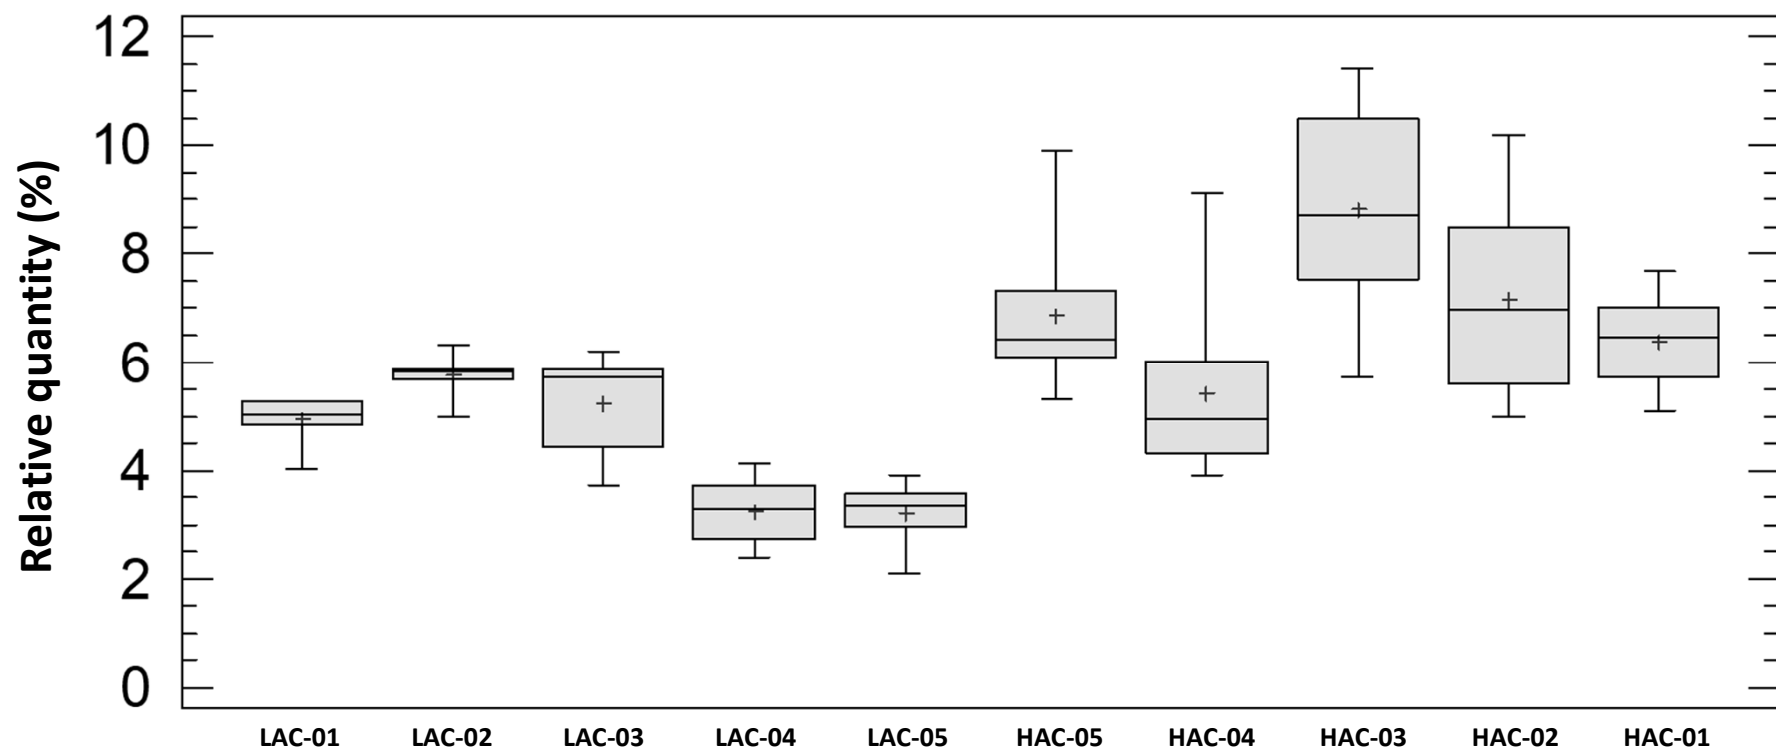

**PE 16:0-17:1**

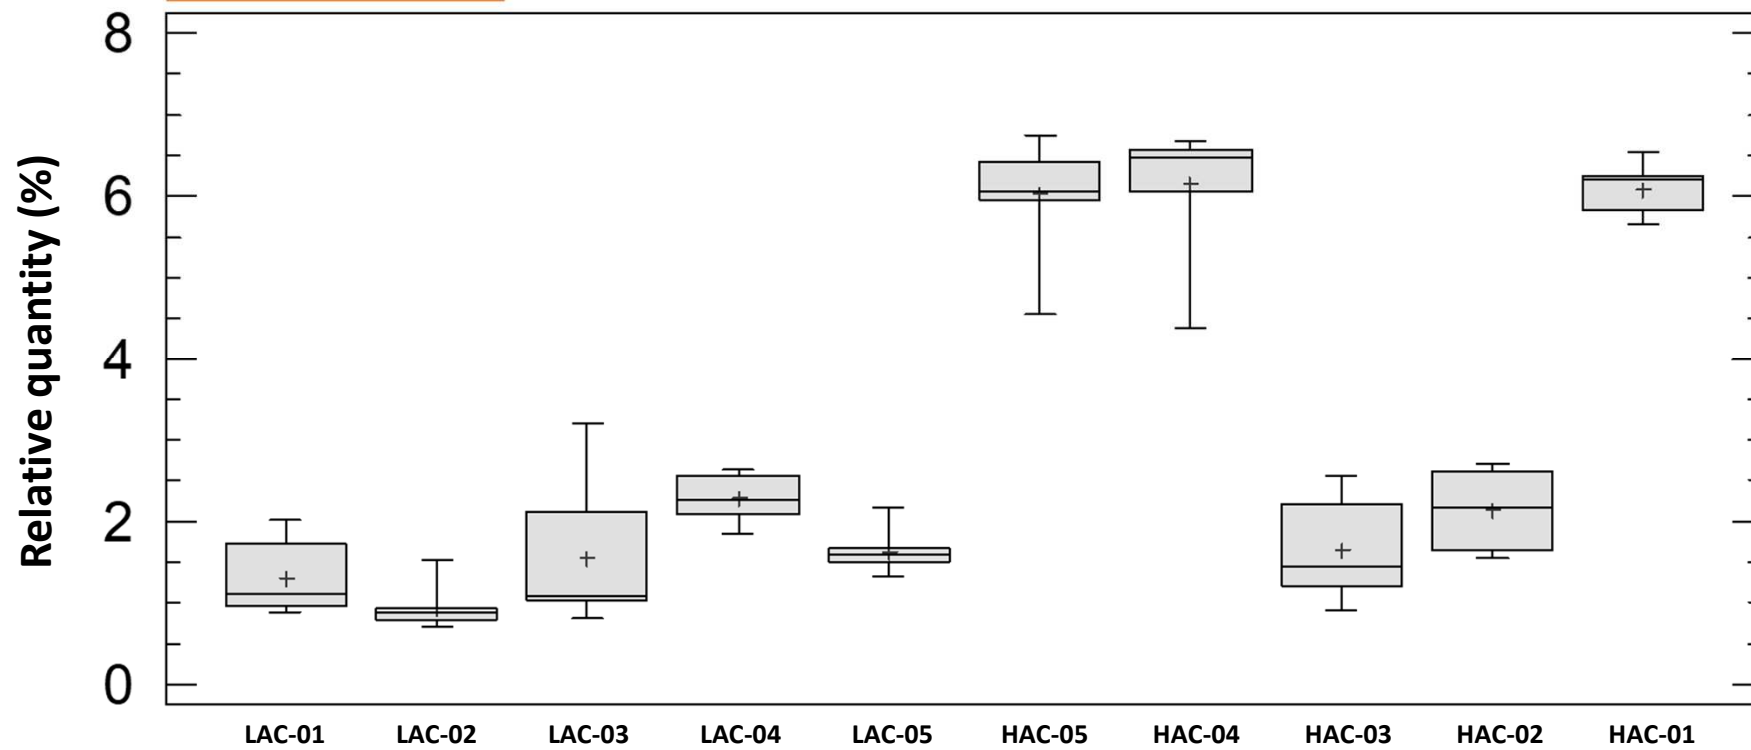

**PE 16:0-18:1**

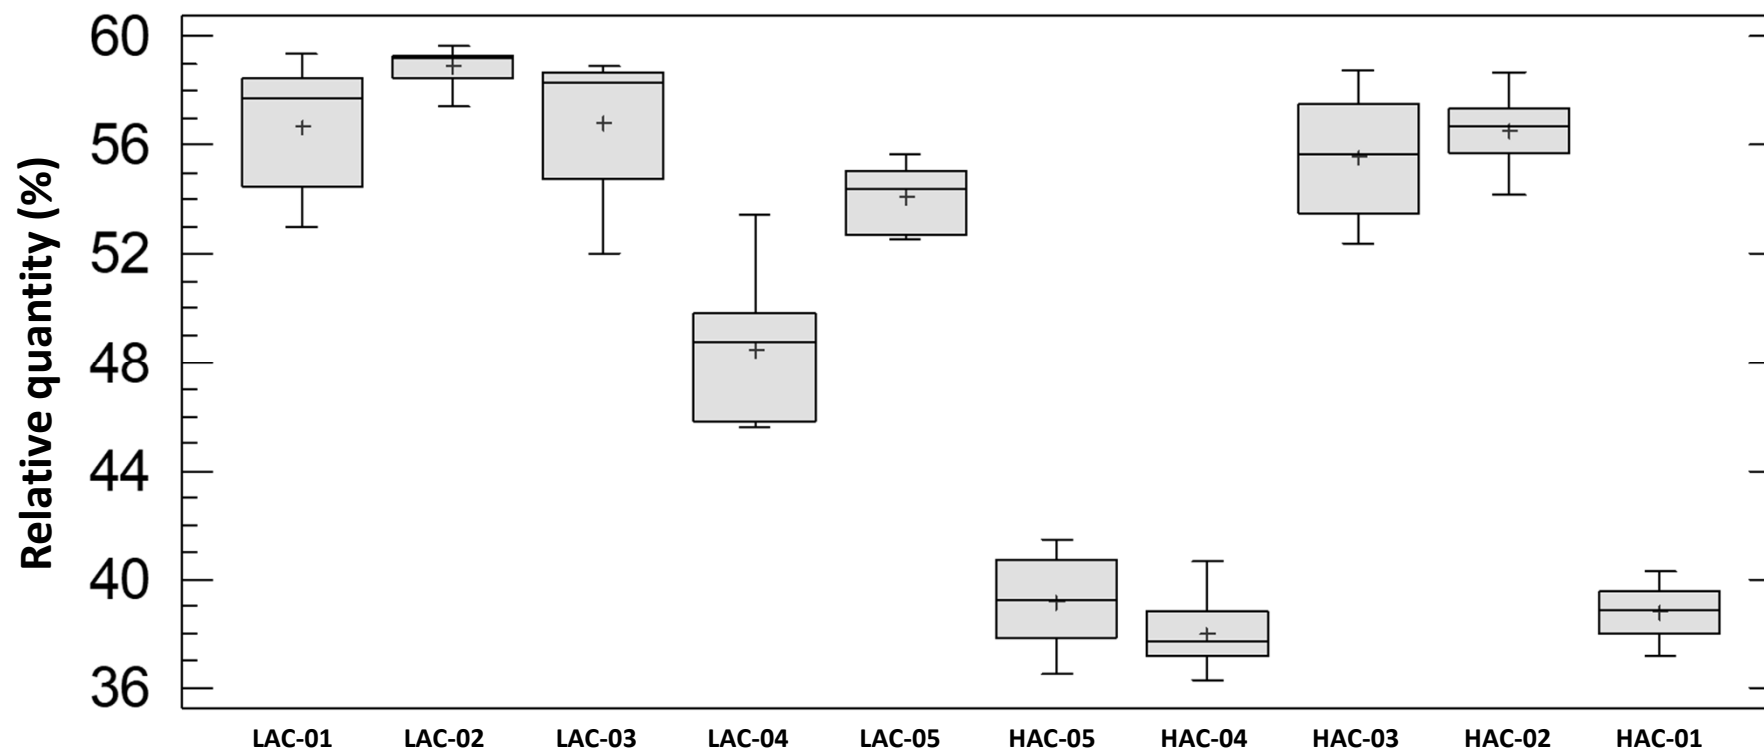

**PE 16:0-19:1**

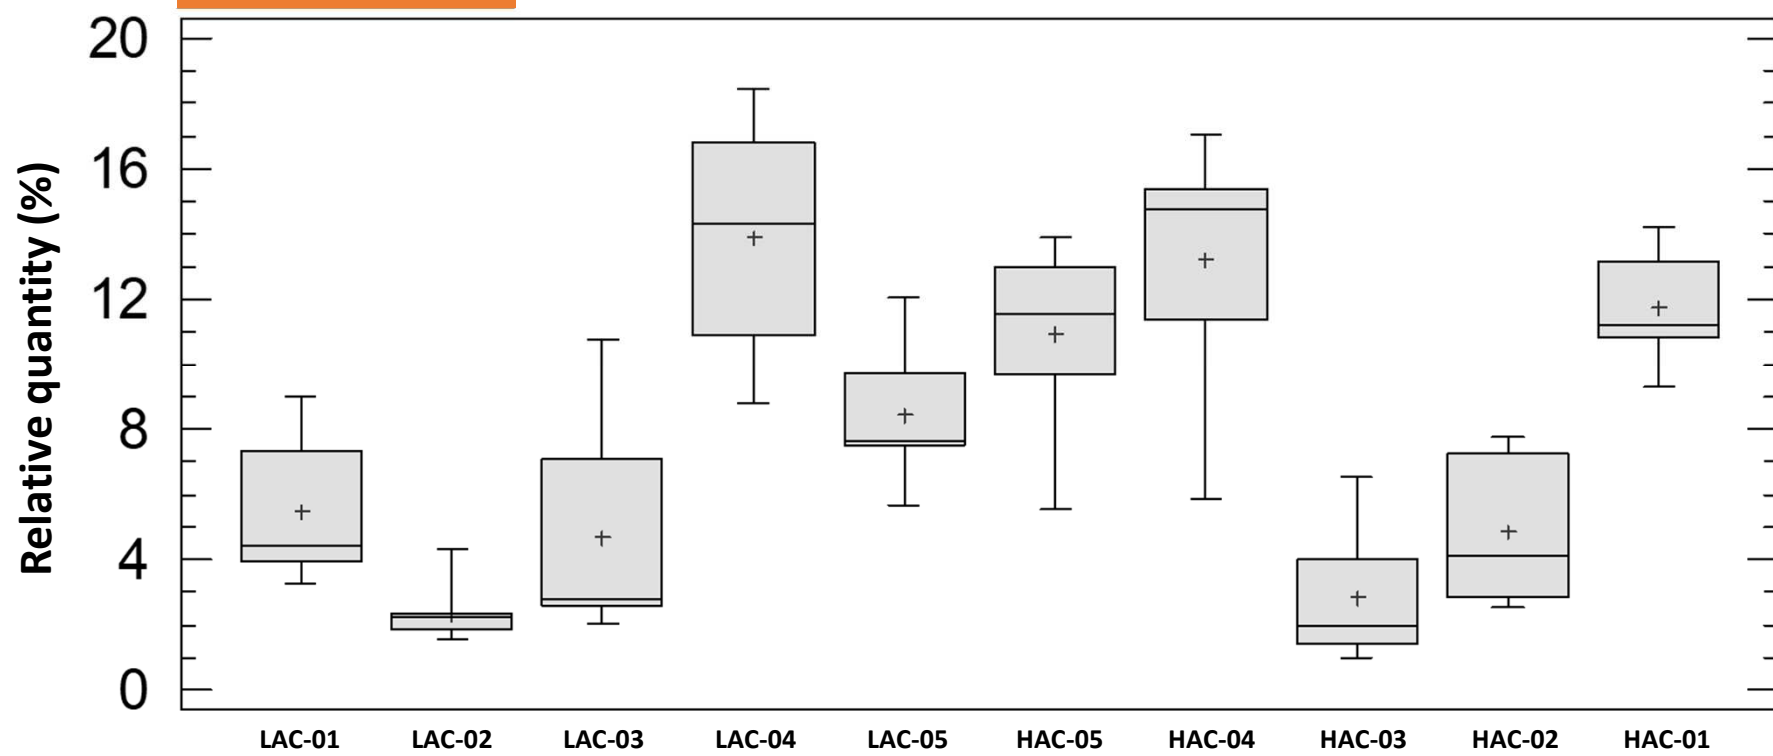

**PE 16:1-18:1**

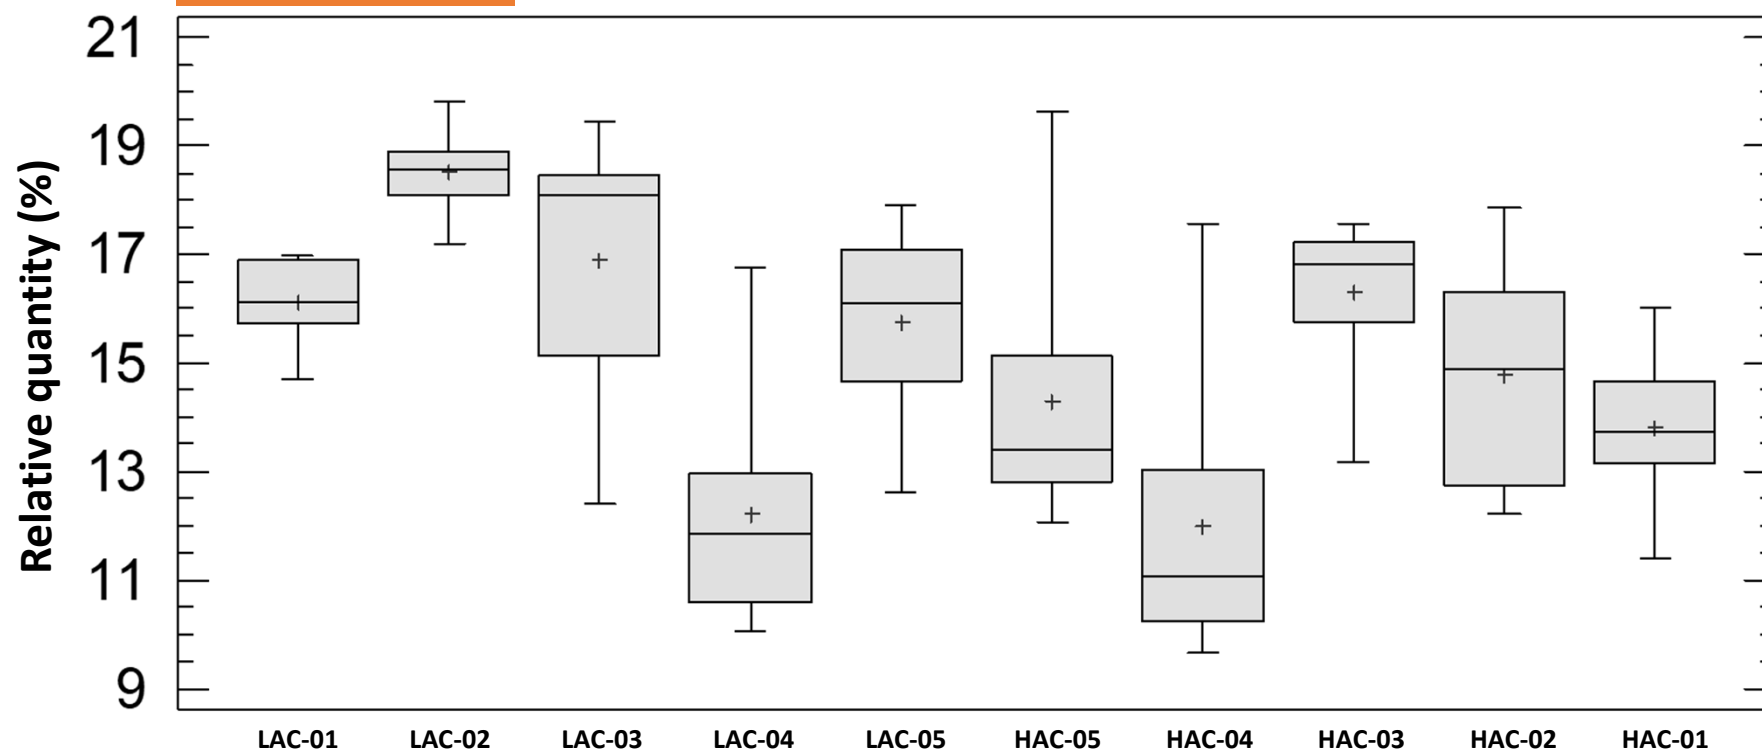



## PE 16:1-19:1

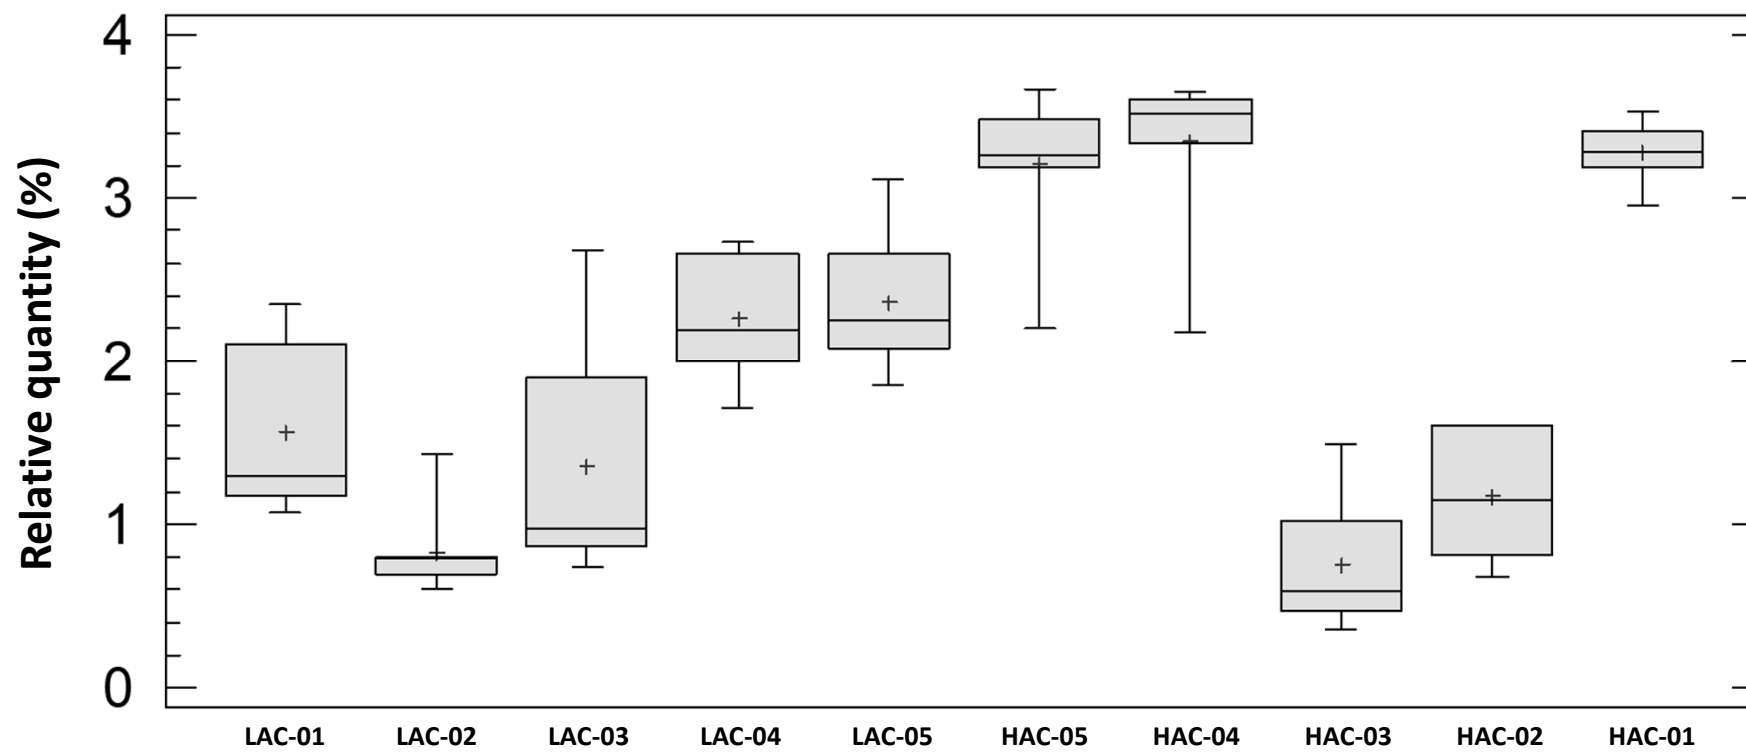

**PE 17:1-18:1**

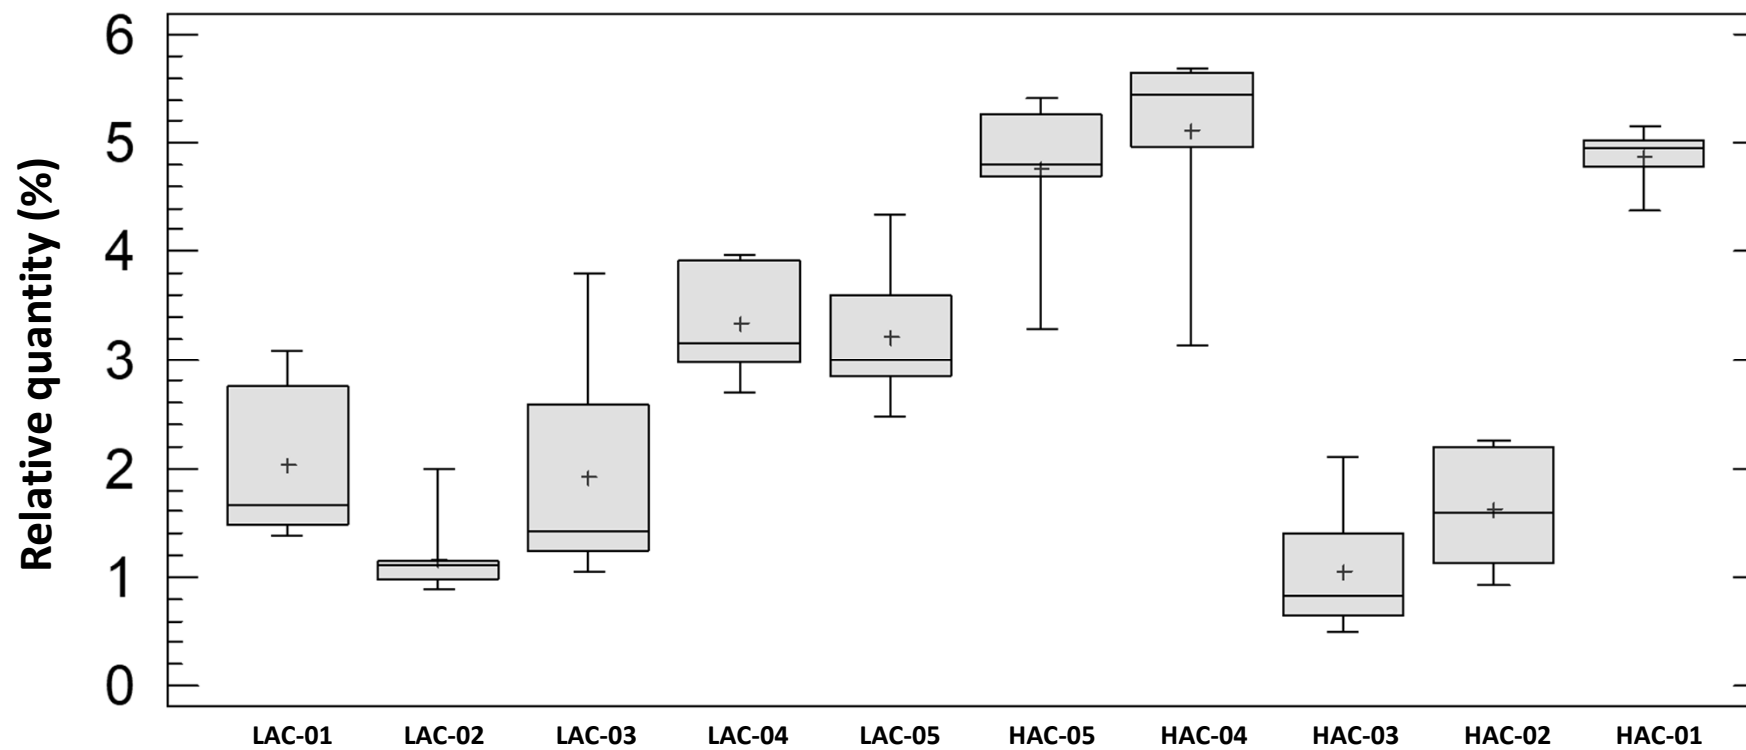

## PE 17:1-19:1

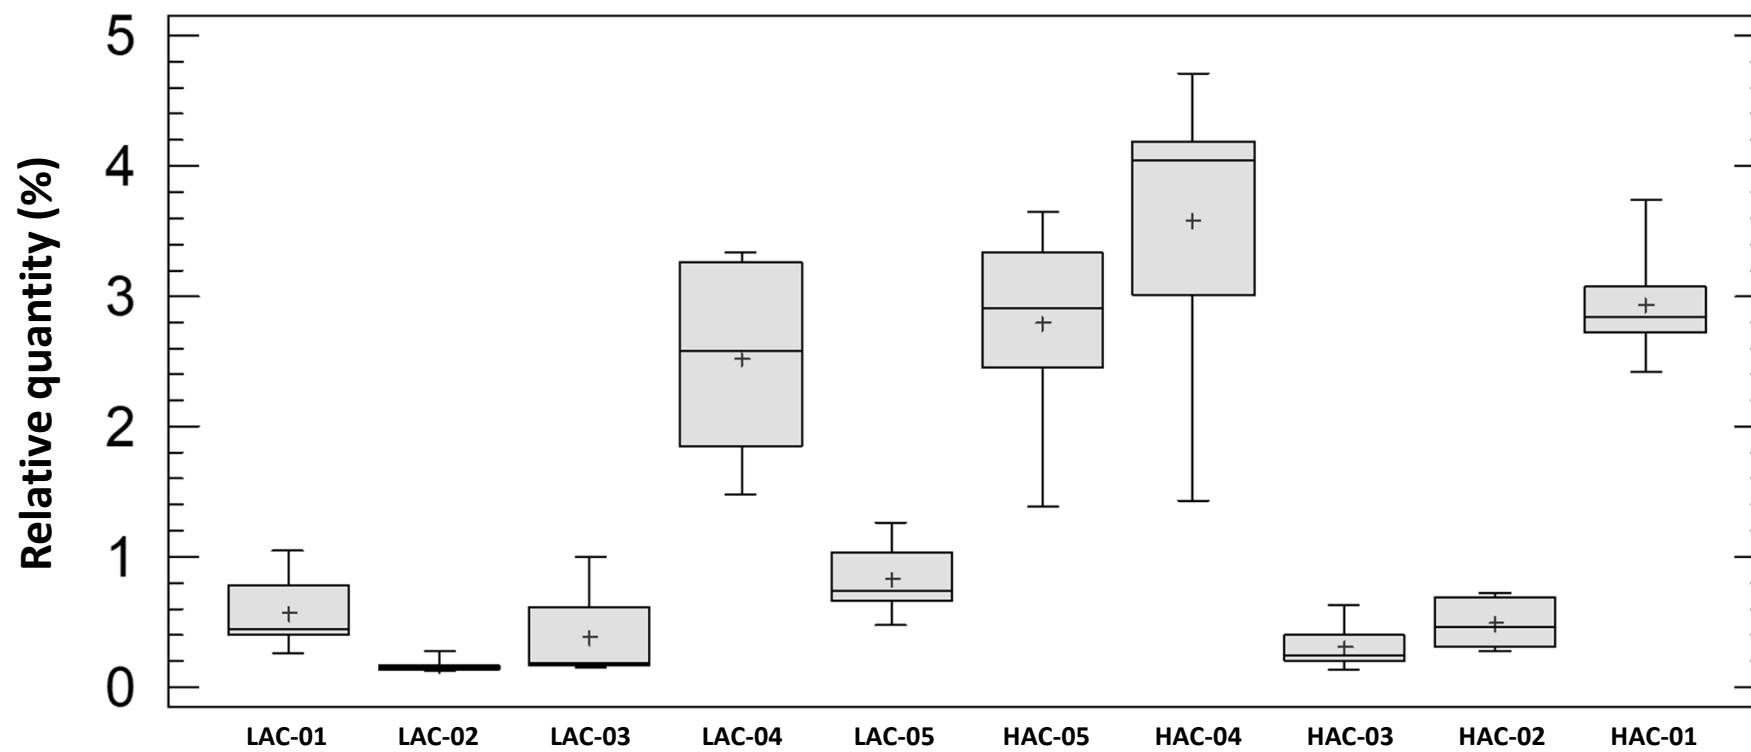

**PE 18:1-18:1**

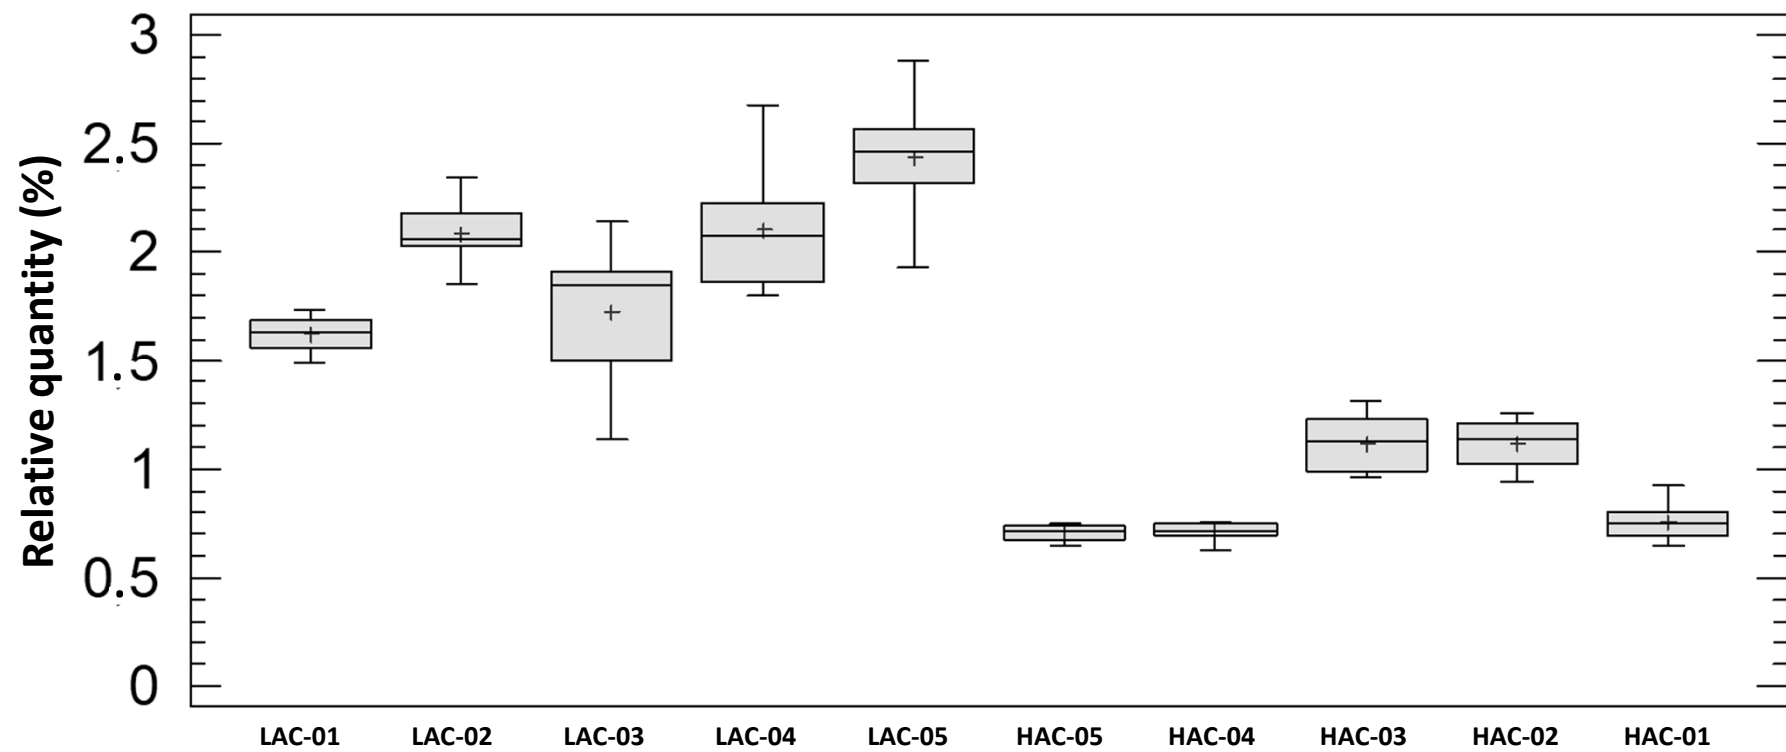

**PG 16:0-16:0**

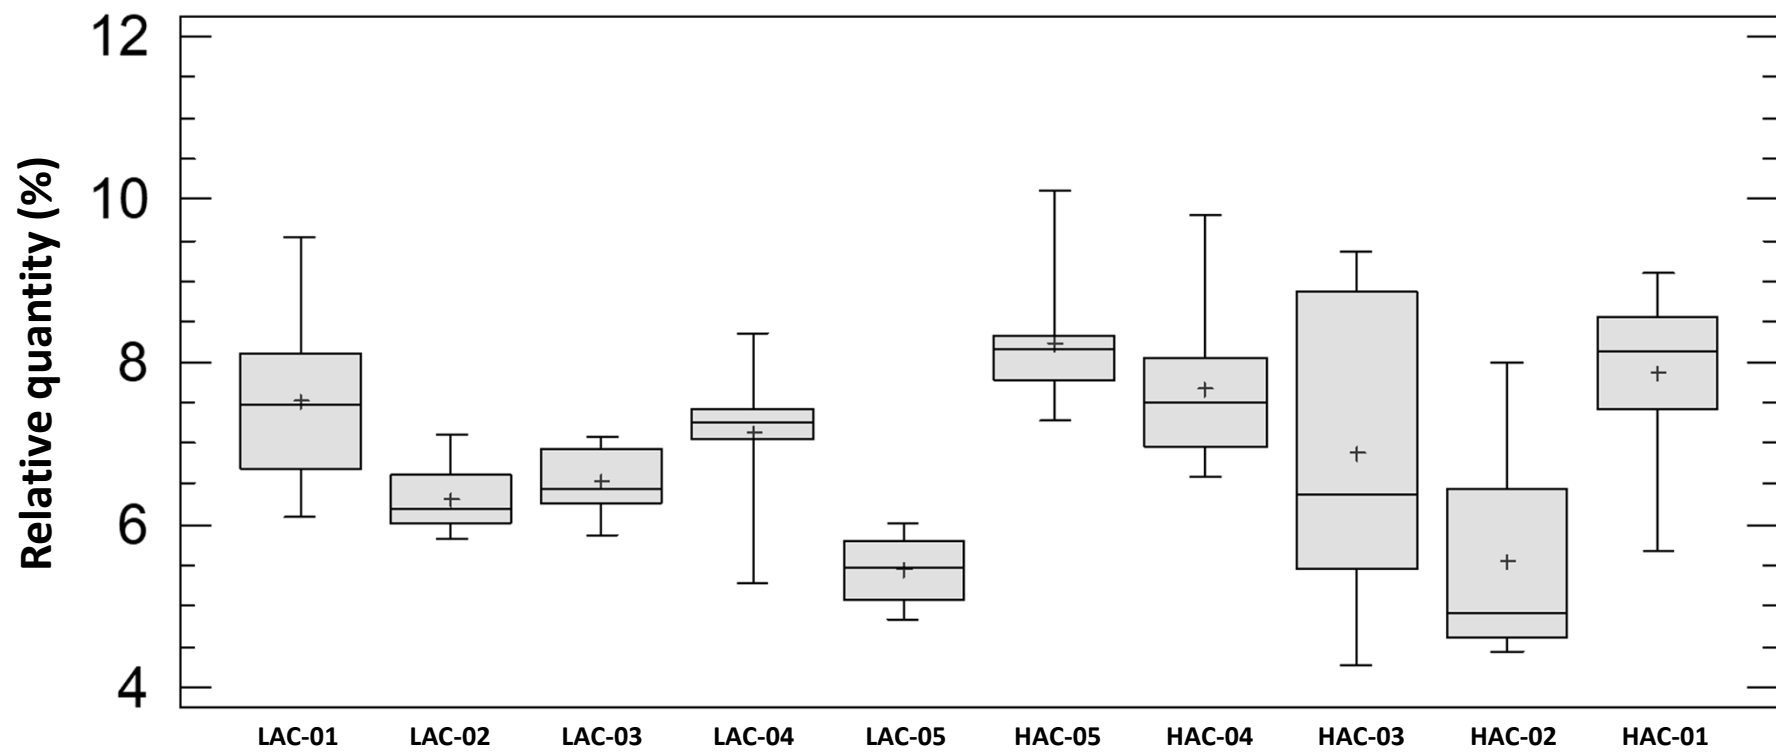

**PG 16:0-17:1**

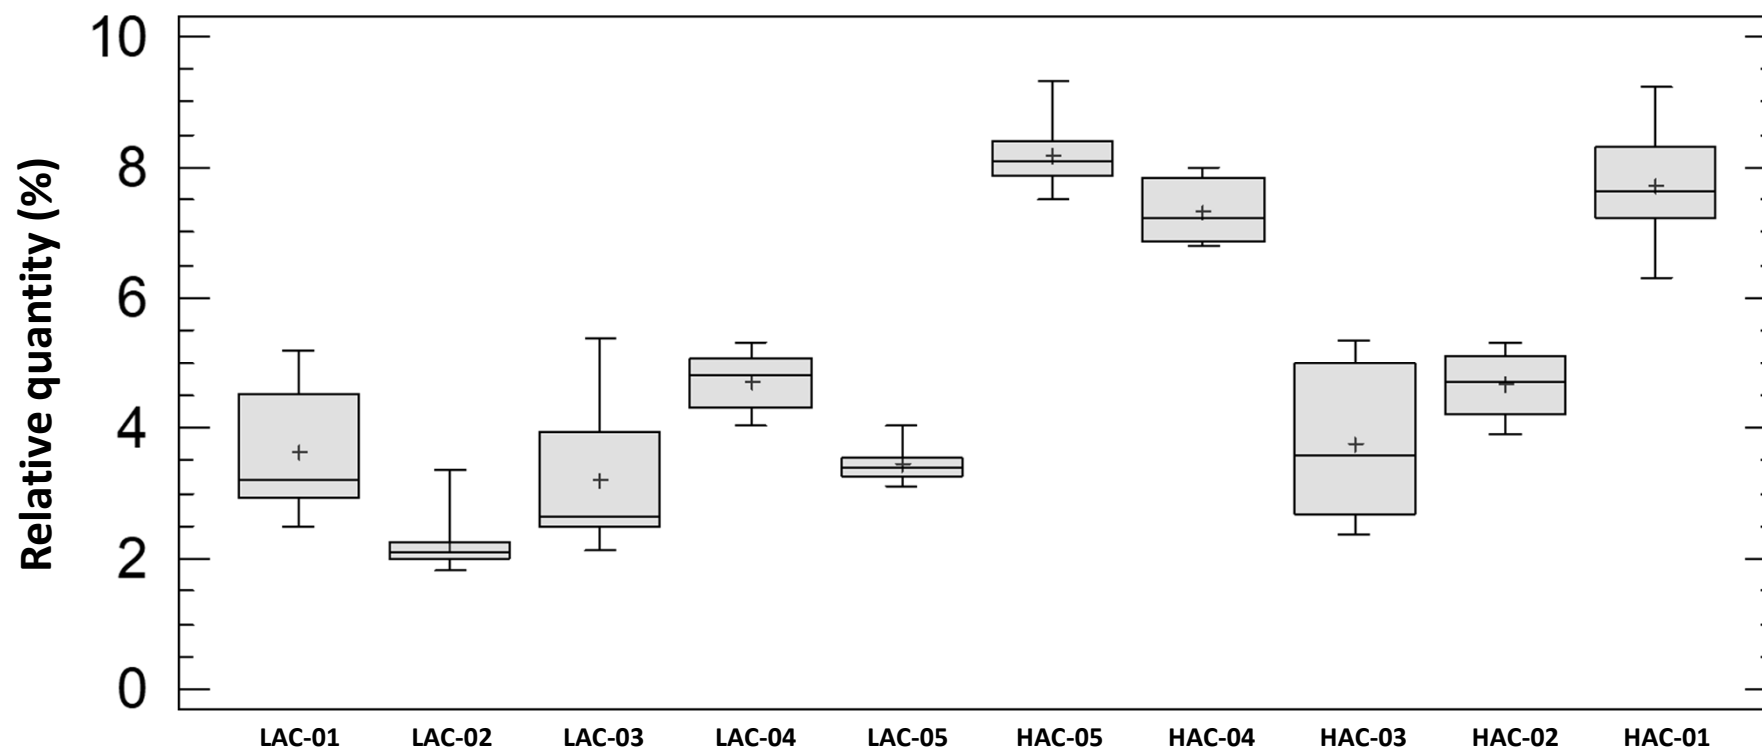

# PG 16:0-18:1

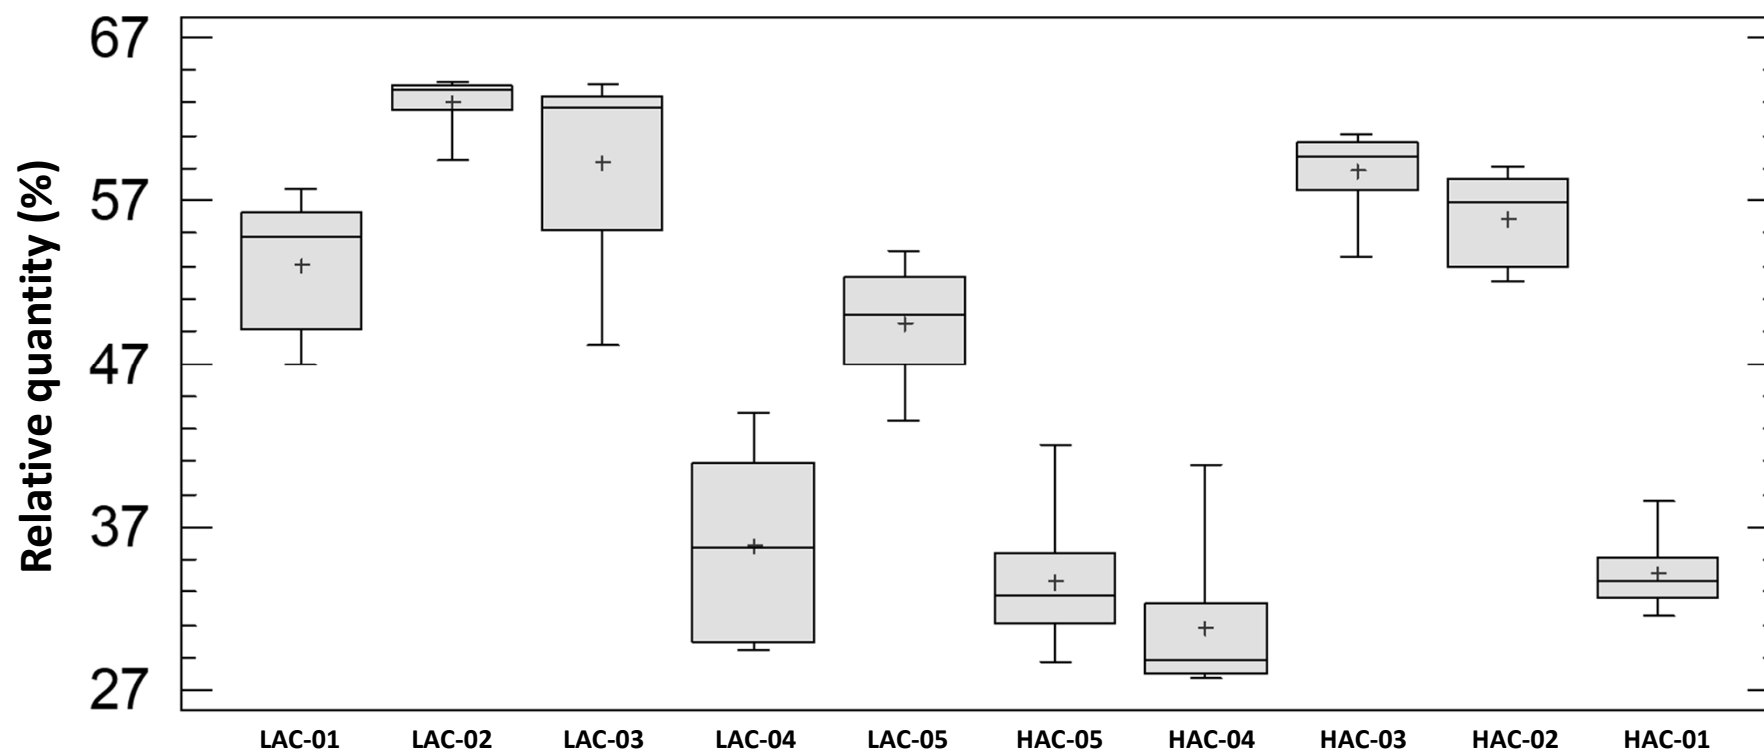

**PG 16:0-19:1**

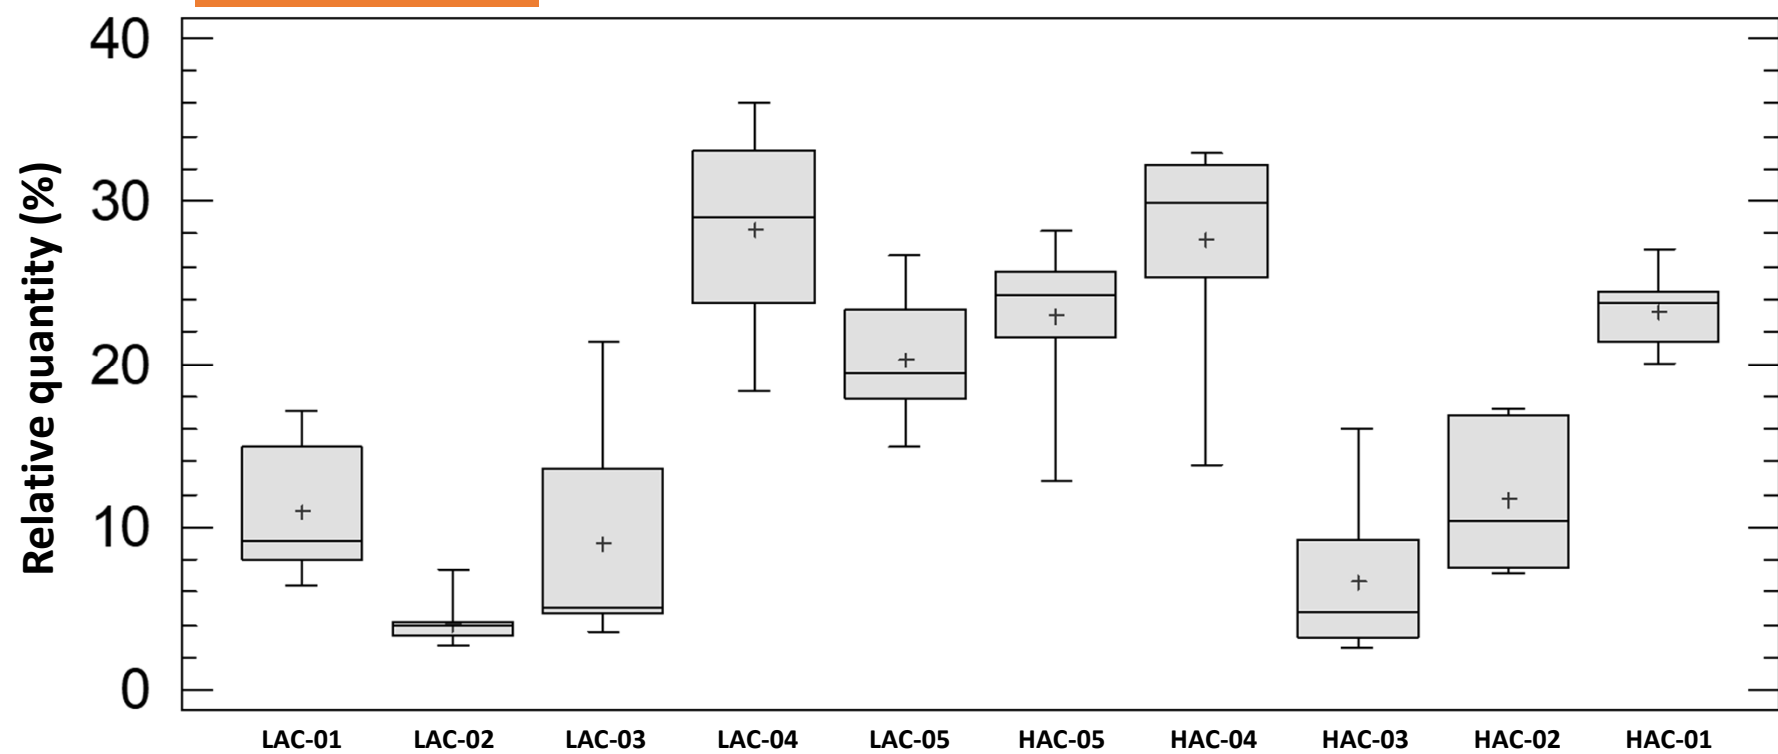



**PG 16:1-18:1**

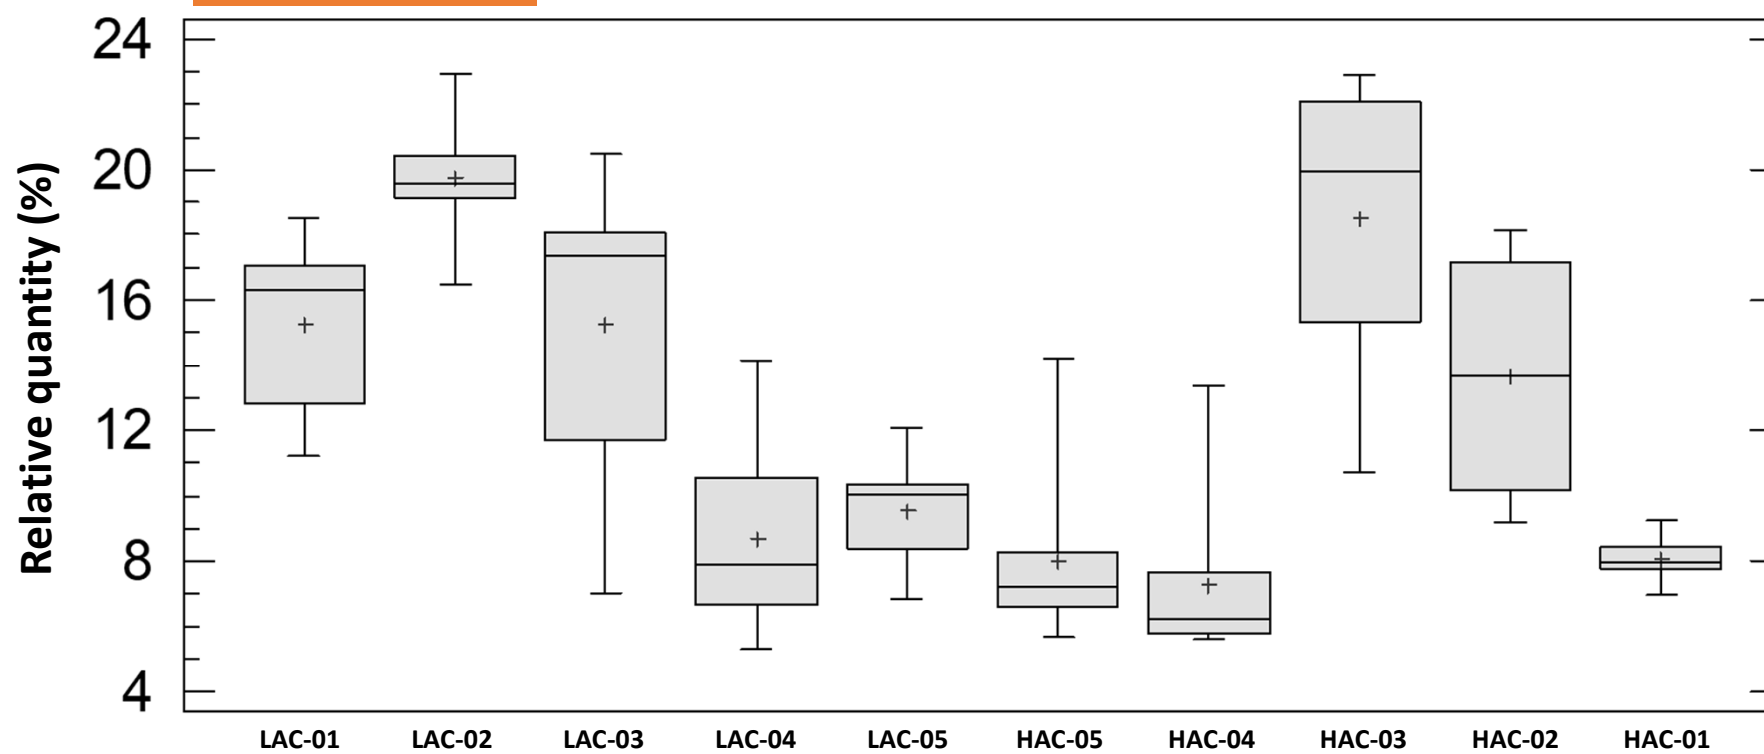

**PG 16:1-19:1**

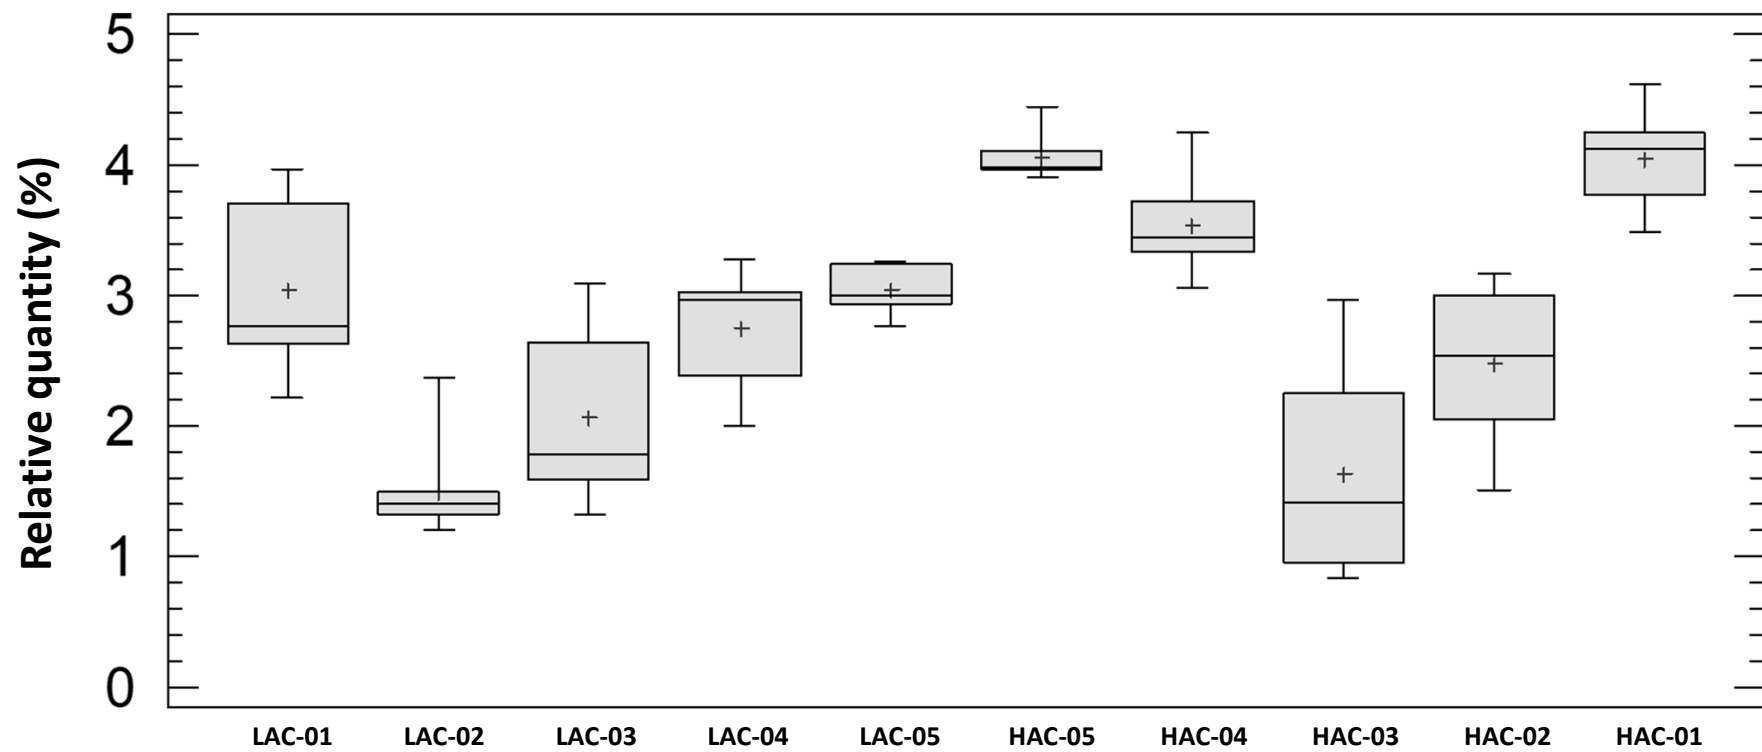

## PG 17:1-18:1

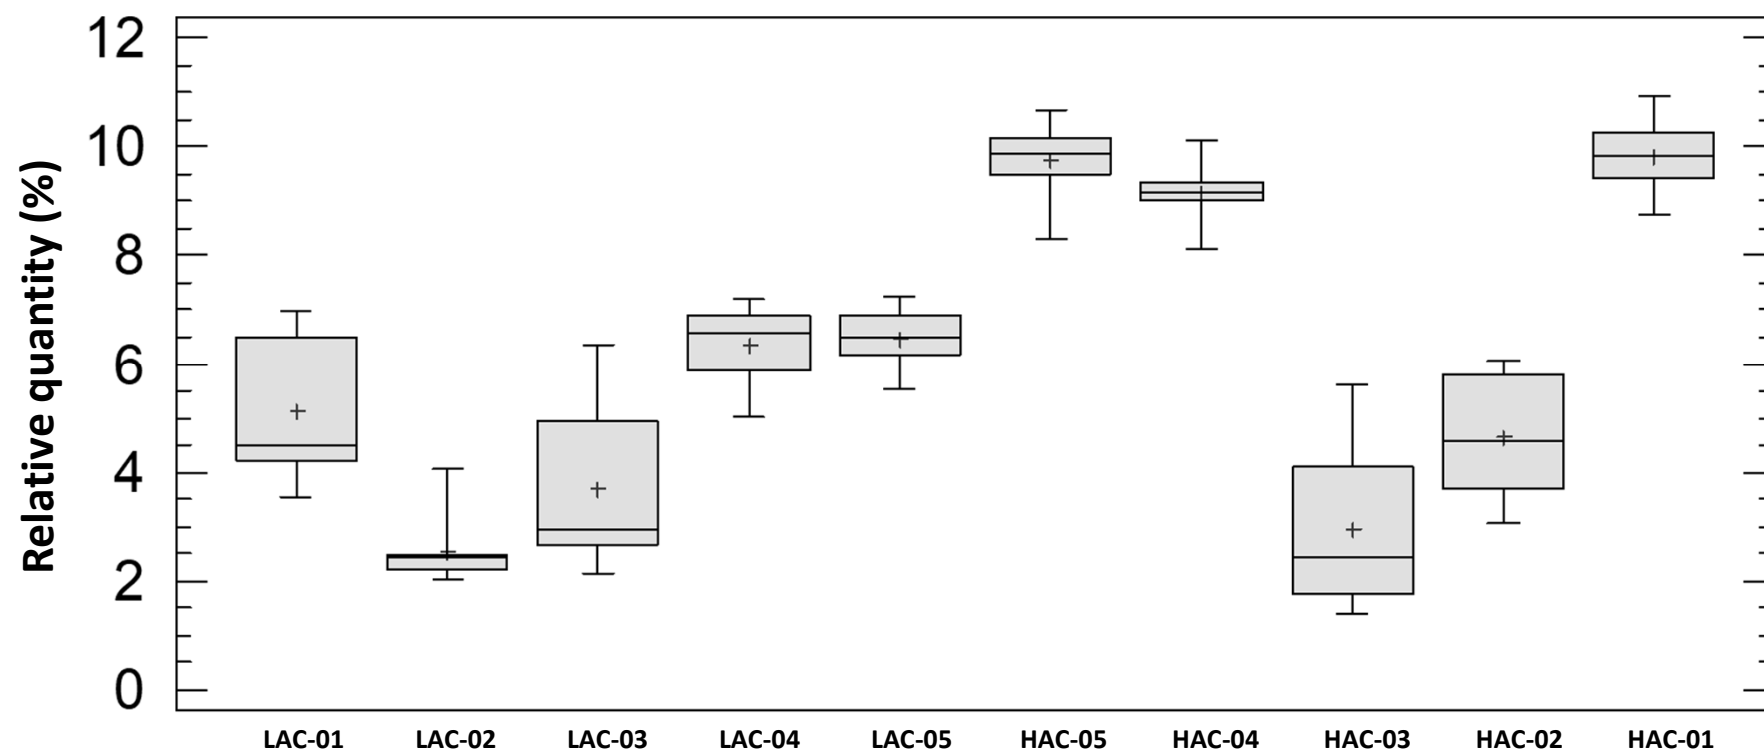

**PG 17:1-19:1**

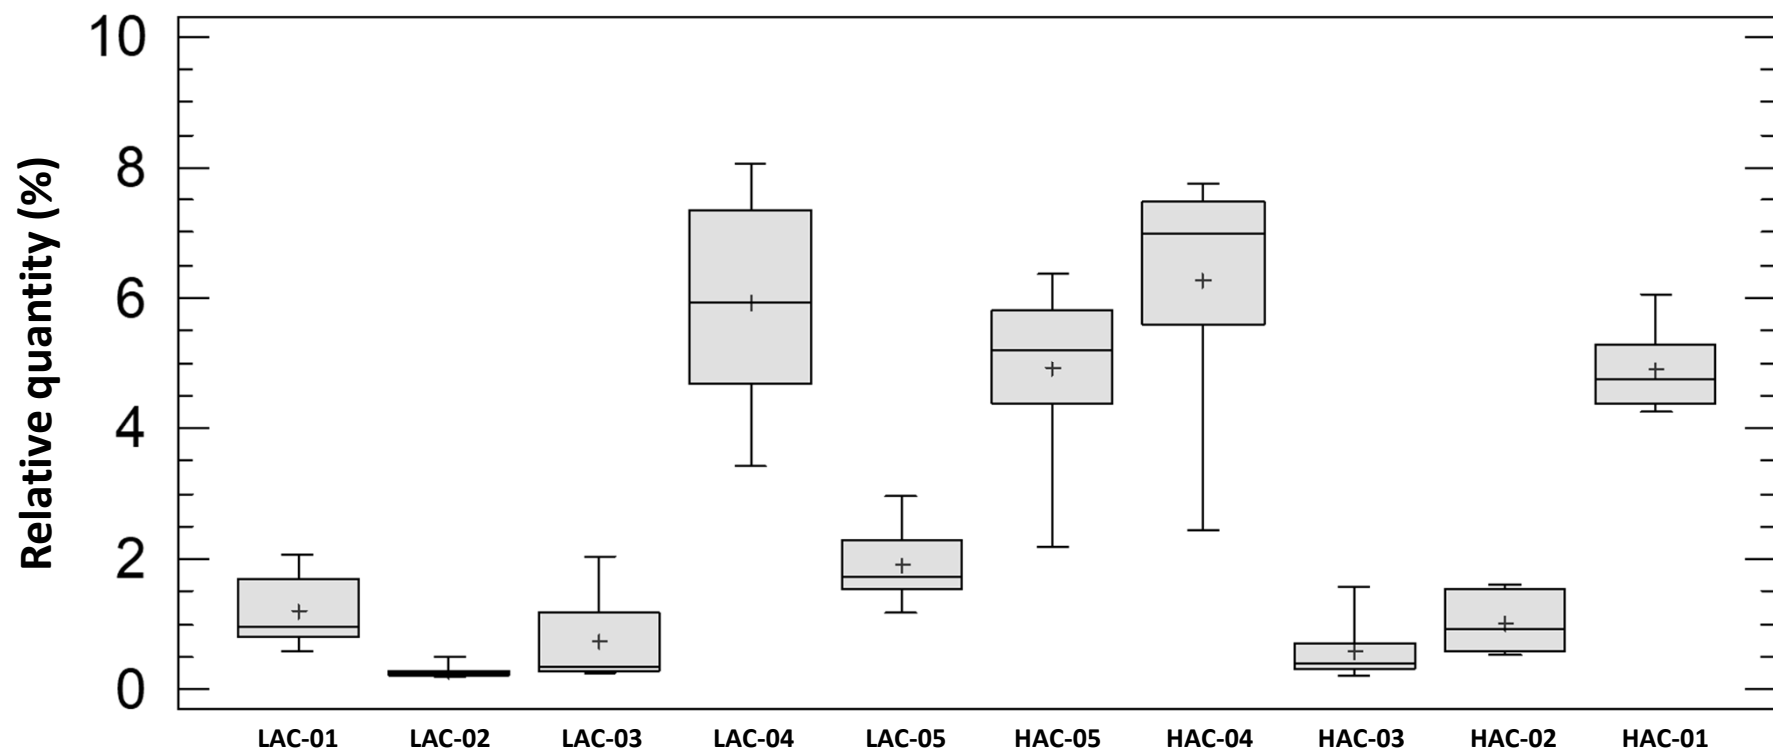

**PG 18:0-18:1**

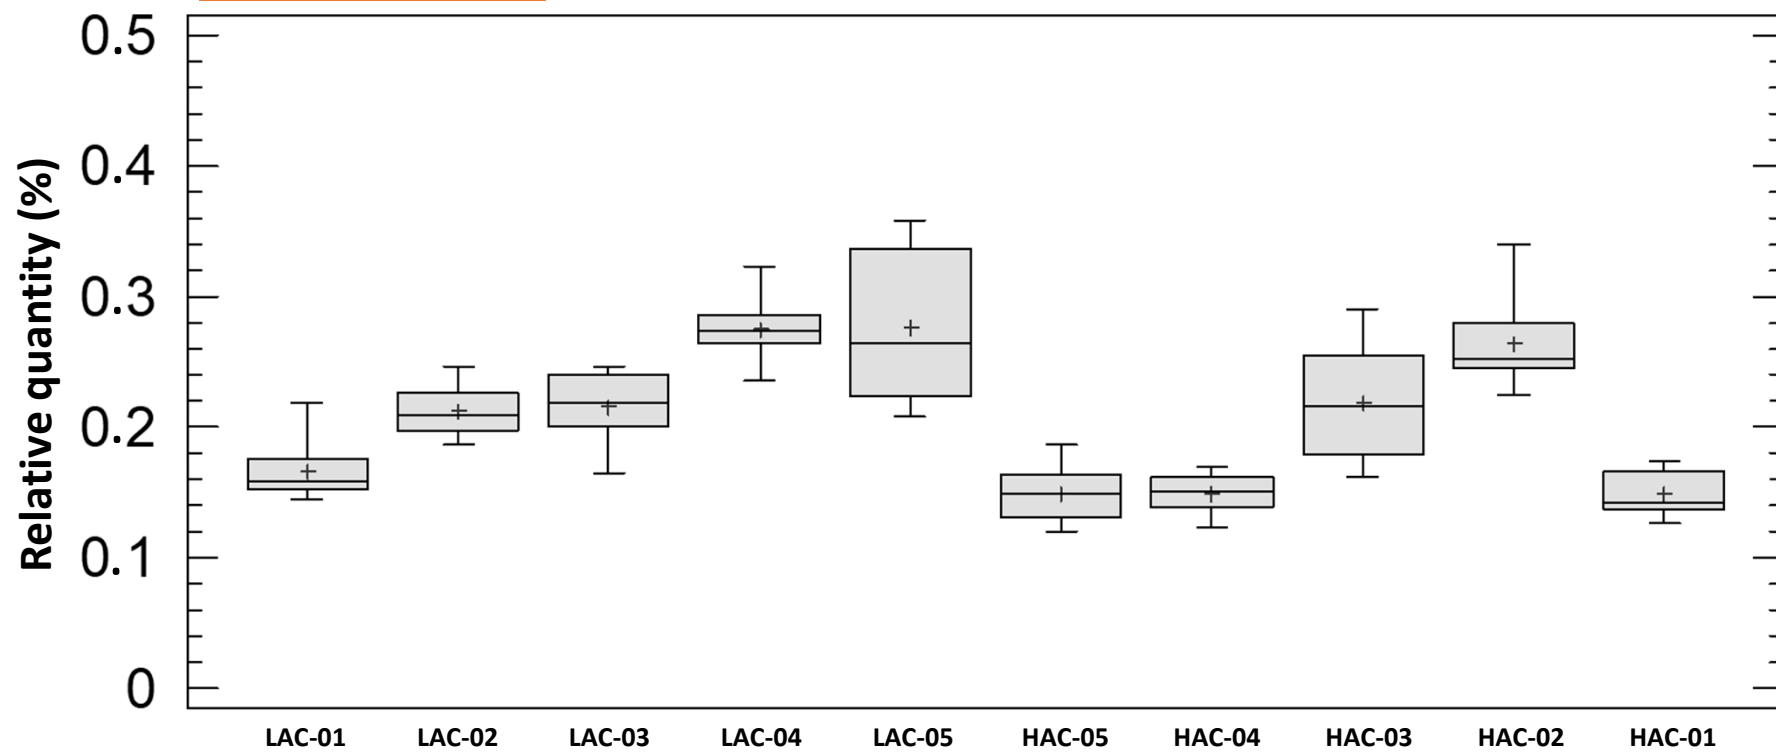

Supplement: s1 [file s1]
